# Supplementary material for: Safety and Immunogenicity of an AS03B-Adjuvanted Inactivated Tetravalent Dengue Virus Vaccine Administered on Varying Schedules to Healthy U.S. Adults: A Phase 1/2 Randomized Study
Source: PubMed Central journal article supplement (PMC7356407; doi:10.4269/ajtmh.19-0738), 2020-04-27
Supplement: tpmd190738.SD1.pdf [file tpmd190738.SD1.pdf]

## **Supplementary Material**

### **A. Inclusion Criteria**

Participants were included in the trial if they met all of the following criteria:

- Provided written informed consent.
- Were healthy as established by medical history and clinical examination at study entry.
- The investigator believed they could and would comply with the requirements of the protocol.
- Able to pass Department of Defense base entry requirements, including the possession of a valid government issued identification card (if assigned at the Walter Reed Army Institute of Research).
- Male or non-pregnant, non-breastfeeding female between 20 and 49 years of age (inclusive) at the time of consent.
- Female participants of non-childbearing potential (non-childbearing potential defined as having had one of the following: a tubal ligation at least 3 months prior to enrollment, a hysterectomy, an ovariectomy, or is post-menopausal).
- Female participants of childbearing potential were enrolled in the study, if all of the following applied:
  - Practiced adequate contraception for 30 days prior to vaccination;
  - Had a negative urine pregnancy test on the day of vaccination;
  - Agreed to continue adequate contraception until 3 months after completion of the vaccination series.

### **B. Exclusion Criteria**

Participants were not enrolled if they met any of the following criteria:

- Used any investigational or non-registered product (drug or vaccine) other than the study vaccines/placebo during the period starting 30 days preceding the first dose of study vaccine/placebo and/or planned use during the study period.

- Chronic administration (defined as more than 14 days in total) of immunosuppressants or other immune-modifying drugs during the period starting 90 days prior to the first vaccine/placebo dose (for corticosteroids, prednisone  $\geq 5$ mg/day or equivalent; inhaled, intranasal and topical steroids were allowed).
- Planned administration or administration of a vaccine/product not planned in the study protocol during the period starting 30 days prior to the first dose of vaccine/placebo until 30 days after the last dose of study vaccine/placebo (routine influenza vaccination were allowed as long as it would not have been not administered within 14 days of the vaccine/placebo and would have been reported to the principal investigator).
- History of dengue infection or dengue illness, or history of flavivirus vaccination (e.g., yellow fever, tick-borne-encephalitis virus, Japanese encephalitis, and dengue).
- Planned administration of any flavivirus vaccine for the entire study duration.
- Concurrent participation in another clinical study, at any time during the study period, in which the participant would have been exposed to an investigational or a non-investigational product (pharmaceutical product or device).
- Confirmed or suspected immunosuppressive or immunodeficient condition, based on medical history and physical examination (no laboratory testing required).
- Family history (first degree relatives only) of congenital or hereditary immunodeficiency.
- Autoimmune disease or history of autoimmune disease.
- History of any reaction or hypersensitivity likely to have been exacerbated by any component of the study vaccine/placebo or related to a study procedure.
- Major congenital defects or serious chronic illness.
- History of any neurological disorders or seizures.

- Diagnosis of excessive daytime sleepiness (unintended sleep episodes during the day present almost daily for at least one month) or narcolepsy; or history of narcolepsy in a participant's parent, sibling, or child
- Acute disease and/or fever ( $\geq 37.5^{\circ}\text{C}/99.5^{\circ}\text{F}$  oral body temperature) at the time of enrollment (a participant with a minor illness such as mild diarrhea, mild upper respiratory infection, etc., without fever, could have been enrolled at the discretion of the investigator).
- Acute or chronic, clinically significant pulmonary, cardiovascular, hepatic or renal functional abnormality, as determined by physical examination or laboratory screening tests.
- Administration of immunoglobulins and/or any blood products during the period starting 90 days preceding the first dose of study vaccine/placebo or planned administration during the study period.
- Recent history of chronic alcohol consumption (more than 2 drinks per day and/or drug abuse) based on participant reported history.
- Pregnant or breastfeeding female or female currently planning to become pregnant or planning to discontinue adequate contraception.
- A planned move to a location that would prohibit participating in the trial until study end for the participant
- Any other condition which, in the opinion of the investigator, prevented the participant from participating in the study.
- Seropositive for hepatitis B surface antigen, hepatitis C virus antibodies, or human immunodeficiency virus antibodies.
- Safety laboratory test results at screening deemed clinically significant or more than grade one deviation from normal.

**Table S1.** Grading of adverse events

| Adverse Event | Intensity Grade | Definition |
|---------------|-----------------|------------|
|---------------|-----------------|------------|

| Adverse Event                                                                | Intensity Grade | Definition                                                                                                                                                           |
|------------------------------------------------------------------------------|-----------------|----------------------------------------------------------------------------------------------------------------------------------------------------------------------|
| <b>Local injection site adverse event</b>                                    |                 |                                                                                                                                                                      |
| Pain at injection site                                                       | 1               | Mild: Any pain neither interfering with nor preventing normal every day activities.                                                                                  |
|                                                                              | 2               | Moderate: Painful when limb is moved and interferes with every day activities.                                                                                       |
|                                                                              | 3               | Severe: Significant pain at rest. Prevents normal every day activities.                                                                                              |
| Redness at injection site                                                    | 1               | Greatest surface diameter $\geq$ 25 to 50 mm                                                                                                                         |
|                                                                              | 2               | Greatest surface diameter $\geq$ 51 to 100 mm                                                                                                                        |
|                                                                              | 3               | Greatest surface diameter $\geq$ 101 mm                                                                                                                              |
| Swelling at injection site                                                   | 1               | Greatest surface diameter $\geq$ 25 to 50 mm                                                                                                                         |
|                                                                              | 2               | Greatest surface diameter $\geq$ 51 to 100 mm                                                                                                                        |
|                                                                              | 3               | Greatest surface diameter $\geq$ 101 mm                                                                                                                              |
| <b>Solicited general adverse events</b>                                      |                 |                                                                                                                                                                      |
| Fever                                                                        | 1               | 37.5 °C – 38.4 °C (99.5 °F – 101.1 °F)                                                                                                                               |
|                                                                              | 2               | 38.5 °C – 38.9 °C (101.2 °F – 102.0 °F)                                                                                                                              |
|                                                                              | 3               | $\geq$ 39.0 °C (102.1 °F)                                                                                                                                            |
| Headache                                                                     | 1               | Mild: Headache that is easily tolerated                                                                                                                              |
|                                                                              | 2               | Moderate: Headache that interferes with normal activity                                                                                                              |
|                                                                              | 3               | Severe: Headache that prevents normal activity                                                                                                                       |
| Fatigue                                                                      | 1               | Mild: Fatigue that is easily tolerated                                                                                                                               |
|                                                                              | 2               | Moderate: Fatigue that interferes with normal activity                                                                                                               |
|                                                                              | 3               | Severe: Fatigue that prevents normal activity                                                                                                                        |
| Gastrointestinal symptoms (nausea, vomiting, diarrhea and/or abdominal pain) | 1               | Mild: Gastrointestinal symptoms that are easily tolerated                                                                                                            |
|                                                                              | 2               | Moderate: Gastrointestinal symptoms that interfere with normal activity                                                                                              |
|                                                                              | 3               | Severe: Gastrointestinal symptoms that prevent normal activity                                                                                                       |
| Joint pain                                                                   | 1               | Mild: Joint pain that is easily tolerated                                                                                                                            |
|                                                                              | 2               | Moderate: Joint pain that interferes with normal activity                                                                                                            |
|                                                                              | 3               | Severe: Joint pain that prevents normal activity                                                                                                                     |
| Muscle aches                                                                 | 1               | Mild: Muscle aches that is easily tolerated                                                                                                                          |
|                                                                              | 2               | Moderate: Muscle aches that interferes with normal activity                                                                                                          |
|                                                                              | 3               | Severe: Muscle aches that prevents normal activity                                                                                                                   |
| <b>Unsolicited adverse events</b>                                            |                 |                                                                                                                                                                      |
| All                                                                          | 1               | An adverse event which is easily tolerated by the participant, causing minimal discomfort and not interfering with everyday activities                               |
|                                                                              | 2               | An adverse event which is sufficiently discomforting and interferes with normal everyday activities                                                                  |
|                                                                              | 3               | An adverse event which prevents normal, everyday activities (i.e., prevent attendance at work/school) and would necessitate the administration of corrective therapy |

**Table S2.** List of conditions to be recorded as potential immune-mediated diseases

| <b>Neuroinflammatory disorders</b>                                                                                                                                                                                                                                                                                                                                                                                                                                                                                                                                          | <b>Musculoskeletal disorders</b>                                                                                                                                                                                                                                                                                                                                                                                                                                                                                                                                         | <b>Skin disorders</b>                                                                                                                                                                                                                                                                                |
|-----------------------------------------------------------------------------------------------------------------------------------------------------------------------------------------------------------------------------------------------------------------------------------------------------------------------------------------------------------------------------------------------------------------------------------------------------------------------------------------------------------------------------------------------------------------------------|--------------------------------------------------------------------------------------------------------------------------------------------------------------------------------------------------------------------------------------------------------------------------------------------------------------------------------------------------------------------------------------------------------------------------------------------------------------------------------------------------------------------------------------------------------------------------|------------------------------------------------------------------------------------------------------------------------------------------------------------------------------------------------------------------------------------------------------------------------------------------------------|
| <p>Cranial nerve disorders, including paralyses/paresis (e.g. Bell's palsy), and neuritis (e.g. optic neuritis)</p> <p>Multiple sclerosis (including variants)</p> <p>Transverse myelitis</p> <p>Guillain-Barré syndrome, (including Miller Fisher syndrome and other variants)</p> <p>Other demyelinating diseases (including acute disseminated encephalomyelitis)</p> <p>Myasthenia gravis (including Lambert-Eaton myasthenic syndrome)</p> <p>Non-infectious encephalitis/ encephalomyelitis</p> <p>Neuritis (including peripheral neuropathies)</p> <p>Narcolepsy</p> | <p>Systemic lupus erythematosus</p> <p>Scleroderma (including, CREST syndrome and morphoea)</p> <p>Systemic sclerosis</p> <p>Dermatomyositis</p> <p>Polymyositis</p> <p>Antisynthetase syndrome</p> <p>Rheumatoid arthritis,</p> <p>Juvenile chronic arthritis, (including Still's disease)</p> <p>Polymyalgia rheumatica</p> <p>Reactive arthritis</p> <p>Psoriatic arthropathy</p> <p>Ankylosing spondylitis (including undifferentiated spondyloarthritides)</p> <p>Relapsing polychondritis</p> <p>Mixed connective tissue disorder</p>                              | <p>Psoriasis</p> <p>Vitiligo</p> <p>Raynaud's phenomenon</p> <p>Erythema nodosum</p> <p>Autoimmune bullous skin diseases (including pemphigus, pemphigoid and dermatitis herpetiformis)</p> <p>Cutaneous lupus erythematosus</p> <p>Alopecia areata</p> <p>Lichen planus</p> <p>Sweet's syndrome</p> |
| <b>Liver disorders</b>                                                                                                                                                                                                                                                                                                                                                                                                                                                                                                                                                      | <b>Gastrointestinal disorders</b>                                                                                                                                                                                                                                                                                                                                                                                                                                                                                                                                        | <b>Metabolic diseases</b>                                                                                                                                                                                                                                                                            |
| <p>Autoimmune hepatitis</p> <p>Primary biliary cirrhosis</p> <p>Primary sclerosing cholangitis</p> <p>Autoimmune cholangitis.</p>                                                                                                                                                                                                                                                                                                                                                                                                                                           | <p>Crohn's disease</p> <p>Ulcerative colitis</p> <p>Ulcerative proctitis</p> <p>Celiac disease</p>                                                                                                                                                                                                                                                                                                                                                                                                                                                                       | <p>Autoimmune thyroiditis (including Hashimoto's thyroiditis)</p> <p>Grave's or Basedow's disease</p> <p>Diabetes mellitus type I</p> <p>Addison's disease</p>                                                                                                                                       |
| <b>Vasculitides</b>                                                                                                                                                                                                                                                                                                                                                                                                                                                                                                                                                         | <b>Others</b>                                                                                                                                                                                                                                                                                                                                                                                                                                                                                                                                                            |                                                                                                                                                                                                                                                                                                      |
| <p>Large vessels vasculitis including: giant cell arteritis such as Takayasu's arteritis and temporal arteritis.</p> <p>Medium sized and/or small vessels vasculitis including: polyarteritis nodosa, Kawasaki's disease, microscopic polyangiitis, Wegener's granulomatosis, Churg–Strauss syndrome (allergic granulomatous angiitis), Buerger's disease (thromboangiitis obliterans), necrotizing vasculitis and anti-neutrophil cytoplasmic antibody positive vasculitis (type unspecified), Henoch-Schonleinpurpura, Behcet's syndrome, leukocytoclasticvasculitis.</p> | <p>Autoimmune hemolytic anemia</p> <p>Autoimmune thrombocytopenia</p> <p>Antiphospholipid syndrome</p> <p>Pernicious anemia</p> <p>Autoimmune glomerulonephritis (including IgA nephropathy, glomerulonephritis rapidly progressive, membranous glomerulonephritis, membranoproliferative glomerulonephritis, and mesangioproliferative glomerulonephritis)</p> <p>Uveitis</p> <p>Autoimmunemyocarditis/cardiomyopathy</p> <p>Sarcoidosis</p> <p>Stevens-Johnson syndrome</p> <p>Sjögren's syndrome</p> <p>Idiopathic pulmonary fibrosis</p> <p>Goodpasture syndrome</p> |                                                                                                                                                                                                                                                                                                      |

**Table S3.** Summary of demographic characteristics - primary analysis (TVC)

| Characteristics            | Parameters or Categories                  | 0-1 M      | 0-1-6 M    | 0-3 M      |
|----------------------------|-------------------------------------------|------------|------------|------------|
|                            |                                           | N = 35     | N = 35     | N = 70     |
| Age at dose 1 (years)      | Mean ± SD                                 | 31.5 ± 7.8 | 31.6 ± 7.5 | 32.3 ± 8.1 |
| Sex, n (%)                 | Female                                    | 20 (57.1)  | 17 (48.6)  | 31 (44.3)  |
|                            | Male                                      | 15 (42.9)  | 18 (51.4)  | 39 (55.7)  |
| Ethnicity, n (%)           | American Hispanic or Latino               | 3 (8.6)    | 3 (8.6)    | 2 (2.9)    |
|                            | Not American Hispanic or Latino           | 32 (91.4)  | 32 (91.4)  | 68 (97.1)  |
| Geographic Ancestry, n (%) | African Heritage / African American       | 14 (40)    | 20 (57.1)  | 37 (52.9)  |
|                            | Asian - Central/South Asian Heritage      | 2 (5.7)    | 0 (0)      | 2 (2.9)    |
|                            | Asian - East Asian Heritage               | 0 (0)      | 0 (0)      | 3 (4.3)    |
|                            | Asian - Japanese Heritage                 | 0 (0)      | 1 (2.9)    | 0 (0)      |
|                            | Asian - South East Asian Heritage         | 0 (0)      | 0 (0)      | 2 (2.9)    |
|                            | Native Hawaiian or Other Pacific Islander | 0 (0)      | 1 (2.9)    | 0 (0)      |
|                            | White - Arabic / North African Heritage   | 0 (0)      | 0 (0)      | 1 (1.4)    |
|                            | White - Caucasian / European Heritage     | 15 (42.9)  | 13 (37.1)  | 22 (31.4)  |
|                            | Other                                     | 4 (11.4)   | 0 (0)      | 3 (4.3)    |

TVC, total vaccinated cohort; M, month; **0-1 M**, participants receiving 2 doses of adjuvant system 03<sub>B</sub>-adjuvanted inactivated tetravalent dengue virus vaccine (DPIV+AS03<sub>B</sub>) administered one month apart, at M0 and M1; **0-1-6 M**, participants receiving 3 doses of DPIV+AS03<sub>B</sub> with first 2 doses given one month apart and the third dose 6 months after the first, at M0, M1 and M6; **0-3 M**, participants receiving 2 doses of DPIV+AS03<sub>B</sub> administered 3 months apart, at M3 and M6; N, total number of participants; n (%), number (percentage) of participants in a given category; SD, standard deviation.

**Table S4.** Incidence of solicited adverse events reported during the 7-day (days 0-6) post-vaccination period following DPiV+AS03B doses (TVC)

|                                                |                 | 0-1 M  |    |                  |        |    |                  | 0-1-6 M |    |                  |        |    |                  | 0-3 M  |    |                  |        |    |                  |        |    |                  |
|------------------------------------------------|-----------------|--------|----|------------------|--------|----|------------------|---------|----|------------------|--------|----|------------------|--------|----|------------------|--------|----|------------------|--------|----|------------------|
|                                                |                 | Dose 1 |    |                  | Dose 2 |    |                  | Dose 1  |    |                  | Dose 2 |    |                  | Dose 3 |    |                  | Dose 1 |    |                  | Dose 2 |    |                  |
| Symptom                                        | Type            | N      | n  | % (95% CI)       | N      | n  | % (95% CI)       | N       | n  | % (95% CI)       | N      | n  | % (95% CI)       | N      | n  | % (95% CI)       | N      | n  | % (95% CI)       | N      | n  | % (95% CI)       |
| <b>Solicited injection site adverse events</b> |                 |        |    |                  |        |    |                  |         |    |                  |        |    |                  |        |    |                  |        |    |                  |        |    |                  |
| Pain                                           | All             | 35     | 24 | 68.6 (50.7-83.1) | 34     | 17 | 50.0 (32.4-67.6) | 35      | 24 | 68.6 (50.7-83.1) | 33     | 14 | 42.4 (25.5-60.8) | 32     | 17 | 53.1 (34.7-70.9) | 67     | 27 | 40.3 (28.5-53.0) | 65     | 22 | 33.8 (22.6-46.6) |
|                                                | Grade 3         | 35     | 0  | 0.0 (0.0-10.0)   | 34     | 0  | 0.0 (0.0-10.3)   | 35      | 0  | 0.0 (0.0-10.0)   | 33     | 1  | 3.0 (0.1-15.8)   | 32     | 0  | 0.0 (0.0-10.9)   | 67     | 2  | 3.0 (0.4-10.4)   | 65     | 0  | 0.0 (0.0-5.5)    |
| Redness                                        | All             | 35     | 0  | 0.0 (0.0-10.0)   | 34     | 1  | 2.9 (0.1-15.3)   | 35      | 0  | 0.0 (0.0-10.0)   | 33     | 0  | 0.0 (0.0-10.6)   | 32     | 0  | 0.0 (0.0-10.9)   | 67     | 0  | 0.0 (0.0-5.4)    | 65     | 0  | 0.0 (0.0-5.5)    |
|                                                | Grade 3         | 35     | 0  | 0.0 (0.0-10.0)   | 34     | 0  | 0.0 (0.0-10.3)   | 35      | 0  | 0.0 (0.0-10.0)   | 33     | 0  | 0.0 (0.0-10.6)   | 32     | 0  | 0.0 (0.0-10.9)   | 67     | 0  | 0.0 (0.0-5.4)    | 65     | 0  | 0.0 (0.0-5.5)    |
| Swelling                                       | All             | 35     | 0  | 0.0 (0.0-10.0)   | 34     | 2  | 5.9 (0.7-19.7)   | 35      | 0  | 0.0 (0.0-10.0)   | 33     | 0  | 0.0 (0.0-10.6)   | 32     | 0  | 0.0 (0.0-10.9)   | 67     | 0  | 0.0 (0.0-5.4)    | 65     | 0  | 0.0 (0.0-5.5)    |
|                                                | Grade 3         | 35     | 0  | 0.0 (0.0-10.0)   | 34     | 0  | 0.0 (0.0-10.3)   | 35      | 0  | 0.0 (0.0-10.0)   | 33     | 0  | 0.0 (0.0-10.6)   | 32     | 0  | 0.0 (0.0-10.9)   | 67     | 0  | 0.0 (0.0-5.4)    | 65     | 0  | 0.0 (0.0-5.5)    |
| <b>Solicited general adverse events</b>        |                 |        |    |                  |        |    |                  |         |    |                  |        |    |                  |        |    |                  |        |    |                  |        |    |                  |
| Fatigue                                        | All             | 35     | 5  | 14.3 (4.8-30.3)  | 34     | 3  | 8.8 (1.9-23.7)   | 35      | 9  | 25.7 (12.5-43.3) | 33     | 10 | 30.3 (15.6-48.7) | 32     | 7  | 21.9 (9.3-40.0)  | 67     | 12 | 17.9 (9.6-29.2)  | 65     | 8  | 12.3 (5.5-22.8)  |
|                                                | Grade 3         | 35     | 0  | 0.0 (0.0-10.0)   | 34     | 1  | 2.9 (0.1-15.3)   | 35      | 0  | 0.0 (0.0-10.0)   | 33     | 0  | 0.0 (0.0-10.6)   | 32     | 1  | 3.1 (0.1-16.2)   | 67     | 1  | 1.5 (0.0-8.0)    | 65     | 0  | 0.0 (0.0-5.5)    |
|                                                | Related         | 35     | 3  | 8.6 (1.8-23.1)   | 34     | 2  | 5.9 (0.7-19.7)   | 35      | 6  | 17.1 (6.6-33.6)  | 33     | 6  | 18.2 (7.0-35.5)  | 32     | 7  | 21.9 (9.3-40.0)  | 67     | 9  | 13.4 (6.3-24.0)  | 65     | 8  | 12.3 (5.5-22.8)  |
|                                                | Grade 3 related | 35     | 0  | 0.0 (0.0-10.0)   | 34     | 0  | 0.0 (0.0-10.3)   | 35      | 0  | 0.0 (0.0-10.0)   | 33     | 0  | 0.0 (0.0-10.6)   | 32     | 1  | 3.1 (0.1-16.2)   | 67     | 1  | 1.5 (0.0-8.0)    | 65     | 0  | 0.0 (0.0-5.5)    |
| GI symptoms                                    | All             | 35     | 5  | 14.3 (4.8-30.3)  | 34     | 2  | 5.9 (0.7-19.7)   | 35      | 1  | 2.9 (0.1-14.9)   | 33     | 3  | 9.1 (1.9-24.3)   | 32     | 2  | 6.3 (0.8-20.8)   | 67     | 3  | 4.5 (0.9-12.5)   | 65     | 6  | 9.2 (3.5-19.0)   |
|                                                | Grade 3         | 35     | 0  | 0.0 (0.0-10.0)   | 34     | 0  | 0.0 (0.0-10.3)   | 35      | 0  | 0.0 (0.0-10.0)   | 33     | 0  | 0.0 (0.0-10.6)   | 32     | 0  | 0.0 (0.0-10.9)   | 67     | 0  | 0.0 (0.0-5.4)    | 65     | 0  | 0.0 (0.0-5.5)    |
|                                                | Related         | 35     | 2  | 5.7 (0.7-19.2)   | 34     | 1  | 2.9 (0.1-15.3)   | 35      | 1  | 2.9 (0.1-14.9)   | 33     | 3  | 9.1 (1.9-24.3)   | 32     | 2  | 6.3 (0.8-20.8)   | 67     | 2  | 3.0 (0.4-10.4)   | 65     | 5  | 7.7 (2.5-17.0)   |
| Headache                                       | Grade 3 related | 35     | 0  | 0.0 (0.0-10.0)   | 34     | 0  | 0.0 (0.0-10.3)   | 35      | 0  | 0.0 (0.0-10.0)   | 33     | 0  | 0.0 (0.0-10.6)   | 32     | 0  | 0.0 (0.0-10.9)   | 67     | 0  | 0.0 (0.0-5.4)    | 65     | 0  | 0.0 (0.0-5.5)    |
|                                                | All             | 35     | 11 | 31.4 (16.9-49.3) | 34     | 3  | 8.8 (1.9-23.7)   | 35      | 10 | 28.6 (14.6-46.3) | 33     | 9  | 27.3 (13.3-45.5) | 32     | 7  | 21.9 (9.3-40.0)  | 67     | 12 | 17.9 (9.6-29.2)  | 65     | 8  | 12.3 (5.5-22.8)  |
|                                                | Grade 3         | 35     | 0  | 0.0 (0.0-10.0)   | 34     | 1  | 2.9 (0.1-15.3)   | 35      | 0  | 0.0 (0.0-10.0)   | 33     | 0  | 0.0 (0.0-10.6)   | 32     | 2  | 6.3 (0.8-20.8)   | 67     | 2  | 3.0 (0.4-10.4)   | 65     | 0  | 0.0 (0.0-5.5)    |
|                                                | Related         | 35     | 8  | 22.9 (10.4-40.1) | 34     | 2  | 5.9 (0.7-19.7)   | 35      | 9  | 25.7 (12.5-43.3) | 33     | 6  | 18.2 (7.0-35.5)  | 32     | 5  | 15.6 (5.3-32.8)  | 67     | 9  | 13.4 (6.3-24.0)  | 65     | 8  | 12.3 (5.5-22.8)  |
| Joint Pain                                     | Grade 3 related | 35     | 0  | 0.0 (0.0-10.0)   | 34     | 0  | 0.0 (0.0-10.3)   | 35      | 0  | 0.0 (0.0-10.0)   | 33     | 0  | 0.0 (0.0-10.6)   | 32     | 2  | 6.3 (0.8-20.8)   | 67     | 1  | 1.5 (0.0-8.0)    | 65     | 0  | 0.0 (0.0-5.5)    |
|                                                | All             | 35     | 3  | 8.6 (1.8-23.1)   | 34     | 3  | 8.8 (1.9-23.7)   | 35      | 4  | 11.4 (3.2-26.7)  | 33     | 4  | 12.1 (3.4-28.2)  | 32     | 3  | 9.4 (2.0-25.0)   | 67     | 6  | 9.0 (3.4-18.5)   | 65     | 3  | 4.6 (1.0-12.9)   |
|                                                | Grade 3         | 35     | 0  | 0.0 (0.0-10.0)   | 34     | 0  | 0.0 (0.0-10.3)   | 35      | 0  | 0.0 (0.0-10.0)   | 33     | 0  | 0.0 (0.0-10.6)   | 32     | 0  | 0.0 (0.0-10.9)   | 67     | 1  | 1.5 (0.0-8.0)    | 65     | 0  | 0.0 (0.0-5.5)    |
|                                                | Related         | 35     | 2  | 5.7 (0.7-19.2)   | 34     | 2  | 5.9 (0.7-19.7)   | 35      | 3  | 8.6 (1.8-23.1)   | 33     | 2  | 6.1 (0.7-20.2)   | 32     | 3  | 9.4 (2.0-25.0)   | 67     | 5  | 7.5 (2.5-16.6)   | 65     | 3  | 4.6 (1.0-12.9)   |
| Muscle Aches                                   | Grade 3 related | 35     | 0  | 0.0 (0.0-10.0)   | 34     | 0  | 0.0 (0.0-10.3)   | 35      | 0  | 0.0 (0.0-10.0)   | 33     | 0  | 0.0 (0.0-10.6)   | 32     | 0  | 0.0 (0.0-10.9)   | 67     | 1  | 1.5 (0.0-8.0)    | 65     | 0  | 0.0 (0.0-5.5)    |
|                                                | All             | 35     | 11 | 31.4 (16.9-49.3) | 34     | 4  | 11.8 (3.3-27.5)  | 35      | 9  | 25.7 (12.5-43.3) | 33     | 10 | 30.3 (15.6-48.7) | 32     | 9  | 28.1 (13.7-46.7) | 67     | 13 | 19.4 (10.8-30.9) | 65     | 9  | 13.8 (6.5-24.7)  |

|              |                        |    |    |                  |    |   |                 |    |   |                  |    |   |                  |    |   |                  |    |    |                 |    |   |                 |
|--------------|------------------------|----|----|------------------|----|---|-----------------|----|---|------------------|----|---|------------------|----|---|------------------|----|----|-----------------|----|---|-----------------|
|              | <b>Grade 3</b>         | 35 | 0  | 0.0 (0.0–10.0)   | 34 | 0 | 0.0 (0.0–10.3)  | 35 | 0 | 0.0 (0.0–10.0)   | 33 | 0 | 0.0 (0.0–10.6)   | 32 | 0 | 0.0 (0.0–10.9)   | 67 | 1  | 1.5 (0.0–8.0)   | 65 | 0 | 0.0 (0.0–5.5)   |
|              | <b>Relater</b>         | 35 | 10 | 28.6 (14.6–46.3) | 34 | 3 | 8.8 (1.9–23.7)  | 35 | 8 | 22.9 (10.4–40.1) | 33 | 8 | 24.2 (11.1–42.3) | 32 | 9 | 28.1 (13.7–46.7) | 67 | 12 | 17.9 (9.6–29.2) | 65 | 9 | 13.8 (6.5–24.7) |
|              | <b>Grade 3 related</b> | 35 | 0  | 0.0 (0.0–10.0)   | 34 | 0 | 0.0 (0.0–10.3)  | 35 | 0 | 0.0 (0.0–10.0)   | 33 | 0 | 0.0 (0.0–10.6)   | 32 | 0 | 0.0 (0.0–10.9)   | 67 | 1  | 1.5 (0.0–8.0)   | 65 | 0 | 0.0 (0.0–5.5)   |
|              | <b>All</b>             | 35 | 3  | 8.6 (1.8–23.1)   | 34 | 4 | 11.8 (3.3–27.5) | 35 | 4 | 11.4 (3.2–26.7)  | 33 | 3 | 9.1 (1.9–24.3)   | 32 | 3 | 9.4 (2.0–25.0)   | 67 | 2  | 3.0 (0.4–10.4)  | 65 | 2 | 3.1 (0.4–10.7)  |
| <b>Fever</b> | <b>≥39.0</b>           | 35 | 0  | 0.0 (0.0–10.0)   | 34 | 1 | 2.9 (0.1–15.3)  | 35 | 0 | 0.0 (0.0–10.0)   | 33 | 0 | 0.0 (0.0–10.6)   | 32 | 0 | 0.0 (0.0–10.9)   | 67 | 1  | 1.5 (0.0–8.0)   | 65 | 1 | 1.5 (0.0–8.3)   |
|              | <b>Related</b>         | 35 | 2  | 5.7 (0.7–19.2)   | 34 | 3 | 8.8 (1.9–23.7)  | 35 | 4 | 11.4 (3.2–26.7)  | 33 | 2 | 6.1 (0.7–20.2)   | 32 | 3 | 9.4 (2.0–25.0)   | 67 | 1  | 1.5 (0.0–8.0)   | 65 | 2 | 3.1 (0.4–10.7)  |
|              | <b>≥39.0 related</b>   | 35 | 0  | 0.0 (0.0–10.0)   | 34 | 1 | 2.9 (0.1–15.3)  | 35 | 0 | 0.0 (0.0–10.0)   | 33 | 0 | 0.0 (0.0–10.6)   | 32 | 0 | 0.0 (0.0–10.9)   | 67 | 0  | 0.0 (0.0–5.4)   | 65 | 1 | 1.5 (0.0–8.3)   |

DPIV+AS03<sub>B</sub>, adjuvant system 03<sub>B</sub>-adjuvanted inactivated tetravalent dengue virus vaccine; TVC, total vaccinated cohort; M, month; N, number of patients with at least one documented dose/documentated doses; n/%, number/percentage of patients/doses followed by at least one type of symptom; 95% CI, 95% confidence interval; **0–1 M**, participants receiving 2 doses of DPIV+AS03<sub>B</sub> administered one month apart, at M0 and M1; **0–1–6 M**, participants receiving 3 doses of DPIV+AS03<sub>B</sub> with first 2 given one month apart and the third given 6 months after the first, at M0, M1 and M6; **0–3 M**, participants receiving 2 doses of DPIV+AS03<sub>B</sub> administered 3 months apart, at M3 and M6; GI, gastrointestinal

Note: Causal relationship to vaccination was assessed by the investigator.



**Table S5.** Listing of SAEs reported up to study end (TVC)

| Group   | Age (Years) | SAE                                     | Primary System<br>Organ Class                                       | MED type | Dose | Day of onset | Duration | Intensity (grade) | Causality | Outcome                          |
|---------|-------------|-----------------------------------------|---------------------------------------------------------------------|----------|------|--------------|----------|-------------------|-----------|----------------------------------|
| 0-1 M   | 42          | Facial bones fracture                   | Injury, poisoning and procedural complications                      | HO       | 4    | 91           | 3        | 3                 | N         | Recovered/resolved               |
| 0-1-6 M | 28          | Alcohol abuse                           | Psychiatric disorders                                               | MD       | 4    | 17           | 46       | 2                 | N         | Recovered/resolved               |
|         | 29          | Adjustment disorder                     | Psychiatric disorders                                               | HO       | 4    | 149          | 11       | 3                 | N         | Recovered/resolved               |
|         | 30          | Bipolar disorder                        | Psychiatric disorders                                               | HO       | 1    | 25           | 5        | 2                 | N         | Recovered/resolved               |
| 0-3 M   | 26          | Seizure                                 | Nervous system disorders                                            | ER       | 3    | 74           | 61       | 1                 | N         | Recovered/resolved with sequelae |
|         | 49          | Diffuse large B cell lymphoma stage III | Neoplasms benign, malignant and unspecified (incl cysts and polyps) | MD       | 4    | 249          | 214      | 2                 | N         | Recovered/resolved with sequelae |
|         | 47          | Facial bones fracture                   | Injury, poisoning and procedural complications                      | HO       | 3    | 34           | 3        | 3                 | N         | Recovered/resolved               |
|         | 34          | Acute HIV infection                     | Infections and infestations                                         | HO       | 4    | 23           | 9        | 3                 | N         | Recovered/resolved with sequelae |
|         | 27          | HIV infection                           | Infections and infestations                                         | MD       | 4    | 307          | .        | 1                 | N         | Not recovered/not resolved       |

TVC, total vaccinated cohort; SAE, serious adverse event; MED, medically attended visit; HO,

hospital; MD, doctor or healthcare provider visit; ER, emergency room; N, negative; 0-1 M,

participants receiving 2 doses of adjuvant system 03<sub>B</sub>-adjuvanted inactivated tetravalent dengue virus

vaccine (DPIV+AS03<sub>B</sub>) administered one month apart, at M0 and M1; 0-1-6 M, participants receiving

3 doses of DPIV+AS03<sub>B</sub> with first 2 given one month apart and the third given 6 months after the first,

at M0, M1 and M6; 0-3 M, participants receiving 2 doses of DPIV+AS03<sub>B</sub> administered 3 months

apart, at M3 and M6.

**Table S6.** GMT ratios post-last DPIV+AS03<sub>B</sub> dose in each group (ATP cohort for immunogenicity)

| Antibody | One month post-last DPIV+AS03 <sub>B</sub> dose   |                         |                          |               |
|----------|---------------------------------------------------|-------------------------|--------------------------|---------------|
|          | GMT                                               |                         | GMT ratio (95% CI)       |               |
|          | 0–1–6 M<br>N = 30                                 | 0–1 M<br>N = 26         | 0–1–6 M over 0–1 M       |               |
| DENV-1   | 4693.3                                            | 345.1                   | 13.6 (8.0–23.2)          |               |
| DENV-2   | 4,821.8                                           | 300.6                   | 16.0 (8.2–31.2)          |               |
| DENV-3   | 6,142.2                                           | 366.0                   | 16.8 (8.7–32.3)          |               |
| DENV-4   | 2,784.0                                           | 128.1                   | 21.7 (10.6–44.4)         |               |
| Antibody | One month post-second DPIV+AS03 <sub>B</sub> dose |                         |                          |               |
|          | 0–3 M<br>N = 55                                   | 0–1 M/0–1–6 M<br>N = 56 | 0–3 M over 0–1 M/0–1–6 M |               |
|          | DENV-1                                            | 987.7                   | 337.7                    | 2.9 (1.9–4.5) |
| DENV-2   | 816.6                                             | 294.5                   | 2.8 (1.7–4.6)            |               |
| DENV-3   | 912.0                                             | 308.6                   | 3.0 (1.8–5.0)            |               |
| DENV-4   | 428.9                                             | 113.1                   | 3.8 (2.1–6.8)            |               |
| Antibody | 12 months post-last DPIV+AS03 <sub>B</sub> dose   |                         |                          |               |
|          | 0–1–6 M<br>N = 26                                 | 0–1 M<br>N = 22         | 0–1–6 M over 0–1 M       |               |
|          | DENV-1                                            | 80.3                    | 34.2                     | 2.3 (0.9–6.1) |
| DENV-2   | 60.5                                              | 25.0                    | 2.4 (1.0–5.8)            |               |
| DENV-3   | 74.7                                              | 76.5                    | 1.0 (0.3–2.8)            |               |
| DENV-4   | 48.3                                              | 15.8                    | 3.1 (1.1–8.5)            |               |
| Antibody | 0–1–6 M<br>N = 26                                 | 0–3 M<br>N = 41         | 0–1–6 M over 0–3 M       |               |
|          | DENV-1                                            | 80.3                    | 100.8                    | 0.8 (0.3–2.0) |
|          | DENV-2                                            | 60.5                    | 79.9                     | 0.8 (0.3–1.9) |
| DENV-3   | 74.7                                              | 107.4                   | 0.7 (0.3–1.9)            |               |
| DENV-4   | 48.3                                              | 63.7                    | 0.8 (0.2–2.4)            |               |
| Antibody | 0–3 M<br>N = 41                                   | 0–1 M<br>N = 22         | 0–3 M over 0–1 M         |               |
|          | DENV-1                                            | 100.8                   | 34.2                     | 2.9 (1.1–8.0) |
|          | DENV-2                                            | 79.9                    | 25.0                     | 3.2 (1.2–8.8) |
| DENV-3   | 107.4                                             | 76.5                    | 1.4 (0.5–4.2)            |               |
| DENV-4   | 63.7                                              | 15.8                    | 4.0 (1.3–12.6)           |               |

GMT, geometric mean antibody titer; DPIV+AS03<sub>B</sub>, adjuvant system 03<sub>B</sub>-adjuvanted inactivated tetravalent dengue virus vaccine; ATP, according to protocol; 95% CI, 95% confidence interval; N, number of patients with post-vaccination results available; DENV, dengue virus; 0–1 M, participants receiving 2 doses of DPIV+AS03<sub>B</sub> administered one month apart, at M0 and M1; 0–1–6 M, participants receiving 3 doses of DPIV+AS03<sub>B</sub> with first 2 given one month apart and the third given 6

months after the first, at M0, M1 and M6; 0-3 M, participants receiving 2 doses of DPIV+AS03B administered 3 months apart, at M3 and M6.

**Table S7.** Seropositivity rates and GMTs for DENV neutralizing antibodies by MN50 up to study end (ATP cohort for immunogenicity)

| Antibody | Group   | Timing | N  | n  | Seropositivity<br>% (95% CI) | GMT<br>Value (95% CI)     |
|----------|---------|--------|----|----|------------------------------|---------------------------|
| DENV-1   | 0-1 M   | M0     | 23 | 0  | 0.0 (0.0-14.8)               | 5.0 (5.0-5.0)             |
|          |         | M1     | 23 | 17 | 73.9 (51.6-89.8)             | 21.2 (13.3-33.7)          |
|          |         | M2     | 23 | 23 | 100.0 (85.2-100.0)           | 354.6 (214.3-586.7)       |
|          |         | M3     | 23 | 23 | 100.0 (85.2-100.0)           | 138.1 (83.6-228.2)        |
|          |         | M5     | 23 | 18 | 78.3 (56.3-92.5)             | 29.9 (16.8-53.2)          |
|          |         | M6     | 23 | 21 | 91.3 (72.0-98.9)             | 34.3 (19.4-60.5)          |
|          |         | M7     | 23 | 19 | 82.6 (61.2-95.0)             | 37.9 (20.2-71.1)          |
|          |         | M10    | 23 | 17 | 73.9 (51.6-89.8)             | 36.5 (17.0-78.8)          |
|          |         | M13    | 22 | 16 | 72.7 (49.8-89.3)             | 34.2 (16.6-70.4)          |
|          | 0-1-6 M | M0     | 26 | 0  | 0.0 (0.0-13.2)               | 5.0 (5.0-5.0)             |
|          |         | M1     | 26 | 18 | 69.2 (48.2-85.7)             | 25.0 (14.9-41.9)          |
|          |         | M2     | 26 | 26 | 100.0 (86.8-100.0)           | 323.9 (198.1-529.6)       |
|          |         | M3     | 26 | 25 | 96.2 (80.4-99.9)             | 103.3 (64.7-165.0)        |
|          |         | M5     | 26 | 21 | 80.8 (60.6-93.4)             | 25.3 (15.8-40.3)          |
|          |         | M6     | 26 | 21 | 80.8 (60.6-93.4)             | 24.9 (15.5-39.9)          |
|          |         | M7     | 26 | 26 | 100.0 (86.8-100.0)           | 4,184.3 (3,004.9-5,826.6) |
|          |         | M8     | 26 | 26 | 100.0 (86.8-100.0)           | 2,656.6 (1,725.5-4,090.2) |
|          |         | M10    | 26 | 26 | 100.0 (86.8-100.0)           | 1,201.3 (710.6-2,031.1)   |
|          |         | M12    | 26 | 26 | 100.0 (86.8-100.0)           | 665.1 (412.3-1,072.8)     |
|          |         | M15    | 26 | 26 | 100.0 (86.8-100.0)           | 487.7 (276.4-860.6)       |
|          | 0-3 M   | M0     | 42 | 0  | 0.0 (0.0-8.4)                | 5.0 (5.0-5.0)             |
|          |         | M1     | 42 | 1  | 2.4 (0.1-12.6)               | 5.9 (4.2-8.2)             |
|          |         | M2     | 42 | 2  | 4.8 (0.6-16.2)               | 5.9 (4.5-7.7)             |
|          |         | M3     | 42 | 1  | 2.4 (0.1-12.6)               | 5.6 (4.5-7.0)             |
|          |         | M5     | 42 | 11 | 26.2 (13.9-42.0)             | 8.0 (5.9-10.8)            |
|          |         | M6     | 42 | 7  | 16.7 (7.0-31.4)              | 7.7 (5.3-11.1)            |
|          |         | M7     | 42 | 42 | 100.0 (91.6-100.0)           | 1,084.4 (788.2-1,491.9)   |
|          |         | M8     | 42 | 41 | 97.6 (87.4-99.9)             | 478.5 (313.5-730.3)       |
|          |         | M10    | 42 | 40 | 95.2 (83.8-99.4)             | 157.8 (103.9-239.6)       |
|          |         | M12    | 42 | 38 | 90.5 (77.4-97.3)             | 82.4 (52.7-128.6)         |
| DENV-2   | 0-1 M   | M0     | 23 | 0  | 0.0 (0.0-14.8)               | 5.0 (5.0-5.0)             |
|          |         | M1     | 23 | 13 | 56.5 (34.5-76.8)             | 24.6 (12.0-50.8)          |
|          |         | M2     | 23 | 23 | 100.0 (85.2-100.0)           | 334.5 (185.9-601.8)       |
|          |         | M3     | 23 | 22 | 95.7 (78.1-99.9)             | 99.3 (56.1-175.6)         |

| Antibody      | Group          | Timing     | N  | n  | Seropositivity     | GMT                       |
|---------------|----------------|------------|----|----|--------------------|---------------------------|
|               |                |            |    |    | % (95% CI)         | Value (95% CI)            |
|               |                | <b>M5</b>  | 23 | 18 | 78.3 (56.3–92.5)   | 33.6 (19.1–59.3)          |
|               |                | <b>M6</b>  | 23 | 20 | 87.0 (66.4–97.2)   | 39.9 (22.1–72.1)          |
|               |                | <b>M7</b>  | 23 | 19 | 82.6 (61.2–95.0)   | 39.1 (21.3–71.8)          |
|               |                | <b>M10</b> | 23 | 18 | 78.3 (56.3–92.5)   | 28.1 (14.2–55.7)          |
|               |                | <b>M13</b> | 22 | 15 | 68.2 (45.1–86.1)   | 25.0 (12.7–49.5)          |
|               | <b>0–1–6 M</b> | <b>M0</b>  | 26 | 0  | 0.0 (0.0–13.2)     | 5.0 (5.0–5.0)             |
|               |                | <b>M1</b>  | 26 | 17 | 65.4 (44.3–82.8)   | 27.5 (13.5–56.1)          |
|               |                | <b>M2</b>  | 26 | 25 | 96.2 (80.4–99.9)   | 306.4 (184.5–509.1)       |
|               |                | <b>M3</b>  | 26 | 25 | 96.2 (80.4–99.9)   | 80.5 (50.3–128.8)         |
|               |                | <b>M5</b>  | 26 | 21 | 80.8 (60.6–93.4)   | 24.1 (15.2–38.3)          |
|               |                | <b>M6</b>  | 26 | 19 | 73.1 (52.2–88.4)   | 19.5 (12.3–30.9)          |
|               |                | <b>M7</b>  | 26 | 26 | 100.0 (86.8–100.0) | 4,369.5 (2,706.9–7,053.3) |
|               |                | <b>M8</b>  | 26 | 26 | 100.0 (86.8–100.0) | 1,509.6 (850.9–2,678.3)   |
|               |                | <b>M10</b> | 26 | 26 | 100.0 (86.8–100.0) | 836.2 (466.6–1,498.7)     |
|               |                | <b>M12</b> | 26 | 25 | 96.2 (80.4–99.9)   | 639.7 (351.5–1,164.3)     |
|               |                | <b>M15</b> | 26 | 25 | 96.2 (80.4–99.9)   | 539.1 (284.8–1,020.4)     |
|               |                | <b>M18</b> | 26 | 24 | 92.3 (74.9–99.1)   | 60.5 (33.5–109.5)         |
|               | <b>0–3 M</b>   | <b>M0</b>  | 42 | 0  | 0.0 (0.0–8.4)      | 5.0 (5.0–5.0)             |
|               |                | <b>M1</b>  | 42 | 1  | 2.4 (0.1–12.6)     | 5.8 (4.3–7.8)             |
|               |                | <b>M2</b>  | 42 | 2  | 4.8 (0.6–16.2)     | 5.9 (4.6–7.5)             |
|               |                | <b>M3</b>  | 42 | 1  | 2.4 (0.1–12.6)     | 5.5 (4.5–6.6)             |
|               |                | <b>M5</b>  | 42 | 13 | 31.0 (17.6–47.1)   | 8.3 (6.2–11.1)            |
|               |                | <b>M6</b>  | 42 | 5  | 11.9 (4.0–25.6)    | 7.2 (5.1–10.1)            |
|               |                | <b>M7</b>  | 42 | 42 | 100.0 (91.6–100.0) | 960.3 (642.0–1436.4)      |
|               |                | <b>M8</b>  | 42 | 40 | 95.2 (83.8–99.4)   | 300.6 (186.3–485.1)       |
|               |                | <b>M10</b> | 42 | 39 | 92.9 (80.5–98.5)   | 105.5 (66.3–167.6)        |
|               |                | <b>M12</b> | 42 | 36 | 85.7 (71.5–94.6)   | 64.3 (39.9–103.5)         |
|               |                | <b>M15</b> | 41 | 32 | 78.0 (62.4–89.4)   | 50.3 (30.2–83.6)          |
|               |                | <b>M18</b> | 41 | 32 | 78.0 (62.4–89.4)   | 79.9 (41.3–154.4)         |
| <b>DENV-3</b> | <b>0–1 M</b>   | <b>M0</b>  | 23 | 0  | 0.0 (0.0–14.8)     | 5.0 (5.0–5.0)             |
|               |                | <b>M1</b>  | 23 | 17 | 73.9 (51.6–89.8)   | 37.5 (18.4–76.4)          |
|               |                | <b>M2</b>  | 23 | 23 | 100.0 (85.2–100.0) | 373.5 (209.4–666.1)       |
|               |                | <b>M3</b>  | 23 | 22 | 95.7 (78.1–99.9)   | 222.8 (124.0–400.6)       |
|               |                | <b>M5</b>  | 23 | 21 | 91.3 (72.0–98.9)   | 56.0 (31.9–98.5)          |
|               |                | <b>M6</b>  | 23 | 22 | 95.7 (78.1–99.9)   | 68.9 (38.2–124.5)         |
|               |                | <b>M7</b>  | 23 | 18 | 78.3 (56.3–92.5)   | 33.6 (17.9–63.0)          |
|               |                | <b>M10</b> | 23 | 18 | 78.3 (56.3–92.5)   | 38.6 (18.8–79.5)          |
|               |                | <b>M13</b> | 22 | 18 | 81.8 (59.7–94.8)   | 76.5 (32.7–178.6)         |
|               | <b>0–1–6 M</b> | <b>M0</b>  | 26 | 0  | 0.0 (0.0–13.2)     | 5.0 (5.0–5.0)             |
|               |                | <b>M1</b>  | 26 | 18 | 69.2 (48.2–85.7)   | 52.0 (24.9–108.5)         |
|               |                | <b>M2</b>  | 26 | 25 | 96.2 (80.4–99.9)   | 253.1 (141.1–454.2)       |

| Antibody      | Group          | Timing     | N  | n  | Seropositivity     | GMT                       |
|---------------|----------------|------------|----|----|--------------------|---------------------------|
|               |                |            |    |    | % (95% CI)         | Value (95% CI)            |
|               |                | <b>M3</b>  | 26 | 26 | 100.0 (86.8–100.0) | 188.8 (111.1–320.6)       |
|               |                | <b>M5</b>  | 26 | 19 | 73.1 (52.2–88.4)   | 36.6 (19.3–69.5)          |
|               |                | <b>M6</b>  | 26 | 21 | 80.8 (60.6–93.4)   | 38.3 (21.8–67.3)          |
|               |                | <b>M7</b>  | 26 | 26 | 100.0 (86.8–100.0) | 5,664.6 (3,507.2–9,148.9) |
|               |                | <b>M8</b>  | 26 | 26 | 100.0 (86.8–100.0) | 3,487.9 (2,295.9–5,298.7) |
|               |                | <b>M10</b> | 26 | 26 | 100.0 (86.8–100.0) | 1,631.0 (993.4–2,677.6)   |
|               |                | <b>M12</b> | 26 | 26 | 100.0 (86.8–100.0) | 1,449.7 (877.1–2,396.1)   |
|               |                | <b>M15</b> | 26 | 25 | 96.2 (80.4–99.9)   | 850.9 (433.3–1,670.8)     |
|               |                | <b>M18</b> | 26 | 22 | 84.6 (65.1–95.6)   | 74.7 (36.9–151.1)         |
|               | <b>0–3 M</b>   | <b>M0</b>  | 42 | 0  | 0.0 (0.0–8.4)      | 5.0 (5.0–5.0)             |
|               |                | <b>M1</b>  | 42 | 1  | 2.4 (0.1–12.6)     | 5.7 (4.4–7.5)             |
|               |                | <b>M2</b>  | 42 | 2  | 4.8 (0.6–16.2)     | 5.9 (4.7–7.5)             |
|               |                | <b>M3</b>  | 42 | 1  | 2.4 (0.1–12.6)     | 5.5 (4.5–6.8)             |
|               |                | <b>M5</b>  | 42 | 13 | 31.0 (17.6–47.1)   | 8.9 (6.5–12.1)            |
|               |                | <b>M6</b>  | 42 | 13 | 31.0 (17.6–47.1)   | 9.7 (6.6–14.4)            |
|               |                | <b>M7</b>  | 42 | 42 | 100.0 (91.6–100.0) | 1,045.2 (701.6–1557.1)    |
|               |                | <b>M8</b>  | 42 | 41 | 97.6 (87.4–99.9)   | 663.1 (439.7–1,000.1)     |
|               |                | <b>M10</b> | 42 | 39 | 92.9 (80.5–98.5)   | 172.3 (103.5–286.8)       |
|               |                | <b>M12</b> | 42 | 37 | 88.1 (74.4–96.0)   | 125.5 (74.0–212.7)        |
|               |                | <b>M15</b> | 41 | 37 | 90.2 (76.9–97.3)   | 88.6 (53.1–147.6)         |
|               |                | <b>M18</b> | 41 | 32 | 78.0 (62.4–89.4)   | 107.4 (54.3–212.6)        |
| <b>DENV-4</b> | <b>0–1 M</b>   | <b>M0</b>  | 23 | 0  | 0.0 (0.0–14.8)     | 5.0 (5.0–5.0)             |
|               |                | <b>M1</b>  | 23 | 4  | 17.4 (5.0–38.8)    | 8.6 (4.5–16.4)            |
|               |                | <b>M2</b>  | 23 | 21 | 91.3 (72.0–98.9)   | 142.1 (74.7–270.6)        |
|               |                | <b>M3</b>  | 23 | 18 | 78.3 (56.3–92.5)   | 49.6 (25.4–96.6)          |
|               |                | <b>M5</b>  | 23 | 16 | 69.6 (47.1–86.8)   | 23.3 (12.4–43.6)          |
|               |                | <b>M6</b>  | 23 | 15 | 65.2 (42.7–83.6)   | 24.4 (11.7–50.7)          |
|               |                | <b>M7</b>  | 23 | 9  | 39.1 (19.7–61.5)   | 11.0 (6.6–18.2)           |
|               |                | <b>M10</b> | 23 | 10 | 43.5 (23.2–65.5)   | 15.5 (7.0–34.5)           |
|               |                | <b>M13</b> | 22 | 11 | 50.0 (28.2–71.8)   | 15.8 (8.4–29.9)           |
|               | <b>0–1–6 M</b> | <b>M0</b>  | 26 | 0  | 0.0 (0.0–13.2)     | 5.0 (5.0–5.0)             |
|               |                | <b>M1</b>  | 26 | 5  | 19.2 (6.6–39.4)    | 7.6 (5.0–11.5)            |
|               |                | <b>M2</b>  | 26 | 24 | 92.3 (74.9–99.1)   | 98.4 (50.3–192.4)         |
|               |                | <b>M3</b>  | 26 | 20 | 76.9 (56.4–91.0)   | 42.0 (22.4–78.7)          |
|               |                | <b>M5</b>  | 26 | 14 | 53.8 (33.4–73.4)   | 13.5 (8.3–22.0)           |
|               |                | <b>M6</b>  | 26 | 11 | 42.3 (23.4–63.1)   | 13.7 (7.7–24.3)           |
|               |                | <b>M7</b>  | 26 | 26 | 100.0 (86.8–100.0) | 2,505.4 (1,542.4–4,069.4) |
|               |                | <b>M8</b>  | 26 | 26 | 100.0 (86.8–100.0) | 1,680.8 (1,008.0–2,802.7) |
|               |                | <b>M10</b> | 26 | 25 | 96.2 (80.4–99.9)   | 982.8 (476.3–2,027.7)     |
|               |                | <b>M12</b> | 26 | 25 | 96.2 (80.4–99.9)   | 909.9 (478.3–1,730.9)     |
|               |                | <b>M15</b> | 26 | 25 | 96.2 (80.4–99.9)   | 524.7 (258.4–1,065.7)     |

| Antibody | Group        | Timing     | N  | n  | Seropositivity     | GMT                 |
|----------|--------------|------------|----|----|--------------------|---------------------|
|          |              |            |    |    | % (95% CI)         | Value (95% CI)      |
|          |              | <b>M18</b> | 26 | 17 | 65.4 (44.3–82.8)   | 48.3 (21.6–108.0)   |
|          | <b>0–3 M</b> | <b>M0</b>  | 42 | 0  | 0.0 (0.0–8.4)      | 5.0 (5.0–5.0)       |
|          |              | <b>M1</b>  | 42 | 1  | 2.4 (0.1–12.6)     | 5.8 (4.3–8.0)       |
|          |              | <b>M2</b>  | 42 | 2  | 4.8 (0.6–16.2)     | 5.8 (4.7–7.1)       |
|          |              | <b>M3</b>  | 42 | 2  | 4.8 (0.6–16.2)     | 6.1 (4.6–8.1)       |
|          |              | <b>M5</b>  | 42 | 2  | 4.8 (0.6–16.2)     | 5.9 (4.6–7.6)       |
|          |              | <b>M6</b>  | 42 | 3  | 7.1 (1.5–19.5)     | 6.9 (4.7–10.1)      |
|          |              | <b>M7</b>  | 42 | 42 | 100.0 (91.6–100.0) | 485.8 (313.0–754.1) |
|          |              | <b>M8</b>  | 42 | 40 | 95.2 (83.8–99.4)   | 179.5 (107.7–299.2) |
|          |              | <b>M10</b> | 42 | 33 | 78.6 (63.2–89.7)   | 63.4 (36.0–111.8)   |
|          |              | <b>M12</b> | 42 | 27 | 64.3 (48.0–78.4)   | 37.2 (20.6–67.1)    |
|          |              | <b>M15</b> | 41 | 26 | 63.4 (46.9–77.9)   | 27.5 (16.8–44.9)    |
|          |              | <b>M18</b> | 41 | 27 | 65.9 (49.4–79.9)   | 63.7 (29.3–138.2)   |

GMT, geometric mean antibody titer calculated on all participants; ATP, according-to-protocol; M, month; DENV, dengue virus; MN50, microneutralization titer giving 50% reduction in viral infection; N, number of participants with available results; n/%, number/percentage of participants with titer equal to or above endpoint determination equivalent to antibody seropositivity; 95% CI, 95% confidence interval; **0–1 M**, participants receiving 2 doses of adjuvant system 03<sub>B</sub>-adjuvanted inactivated tetravalent dengue virus vaccine (DPIV+AS03<sub>B</sub>) administered one month apart, at M0 and M1; **0–1–6 M**, participants receiving 3 doses of DPIV+AS03<sub>B</sub> with first 2 given one month apart and the third given 6 months after the first, at M0, M1 and M6; **0–3 M**, participants receiving 2 doses of DPIV+AS03<sub>B</sub> administered 3 months apart, at M3 and M6.

**Table S8.** Mean avidity index (ATP cohort for immunogenicity)

| Group   | Timing | N  | Mean Avidity Index |        |        |        |
|---------|--------|----|--------------------|--------|--------|--------|
|         |        |    | DENV-1             | DENV-2 | DENV-3 | DENV-4 |
| 0-1 M   | M0     | 11 | 0.00               | 0.00   | 0.00   | 8.18   |
|         | M2     | 11 | 42.45              | 44.09  | 58.64  | 61.64  |
| 0-1-6 M | M0     | 11 | 0.00               | 0.00   | 0.00   | 0.00   |
|         | M7     | 11 | 102                | 102    | 107.73 | 113.27 |
| 0-3 M   | M2     | 25 | 0.00               | 3.52   | 0.00   | 1.80   |
|         | M7     | 25 | 92.76              | 91.68  | 93.84  | 99.92  |

ATP, according-to-protocol; DENV, dengue virus; N, number of participants with available results; M,

month; 0-1 M, participants receiving 2 doses of adjuvant system 03<sub>B</sub>-adjuvanted inactivated

tetavalent dengue virus vaccine (DPIV+AS03<sub>B</sub>) administered one month apart, at M0 and M1; 0-1-6

M, participants receiving 3 doses of DPIV+AS03<sub>B</sub> with first 2 given one month apart and the third given

6 months after the first, at M0, M1 and M6; 0-3 M, participants receiving 2 doses of DPIV+AS03<sub>B</sub>

administered 3 months apart, at M3 and M6.



**Figure S1.** Overall per dose incidence of solicited injection-site (A) and general (B) adverse events during the 7-day post-vaccination period (initially dengue seropositive TVC participants)

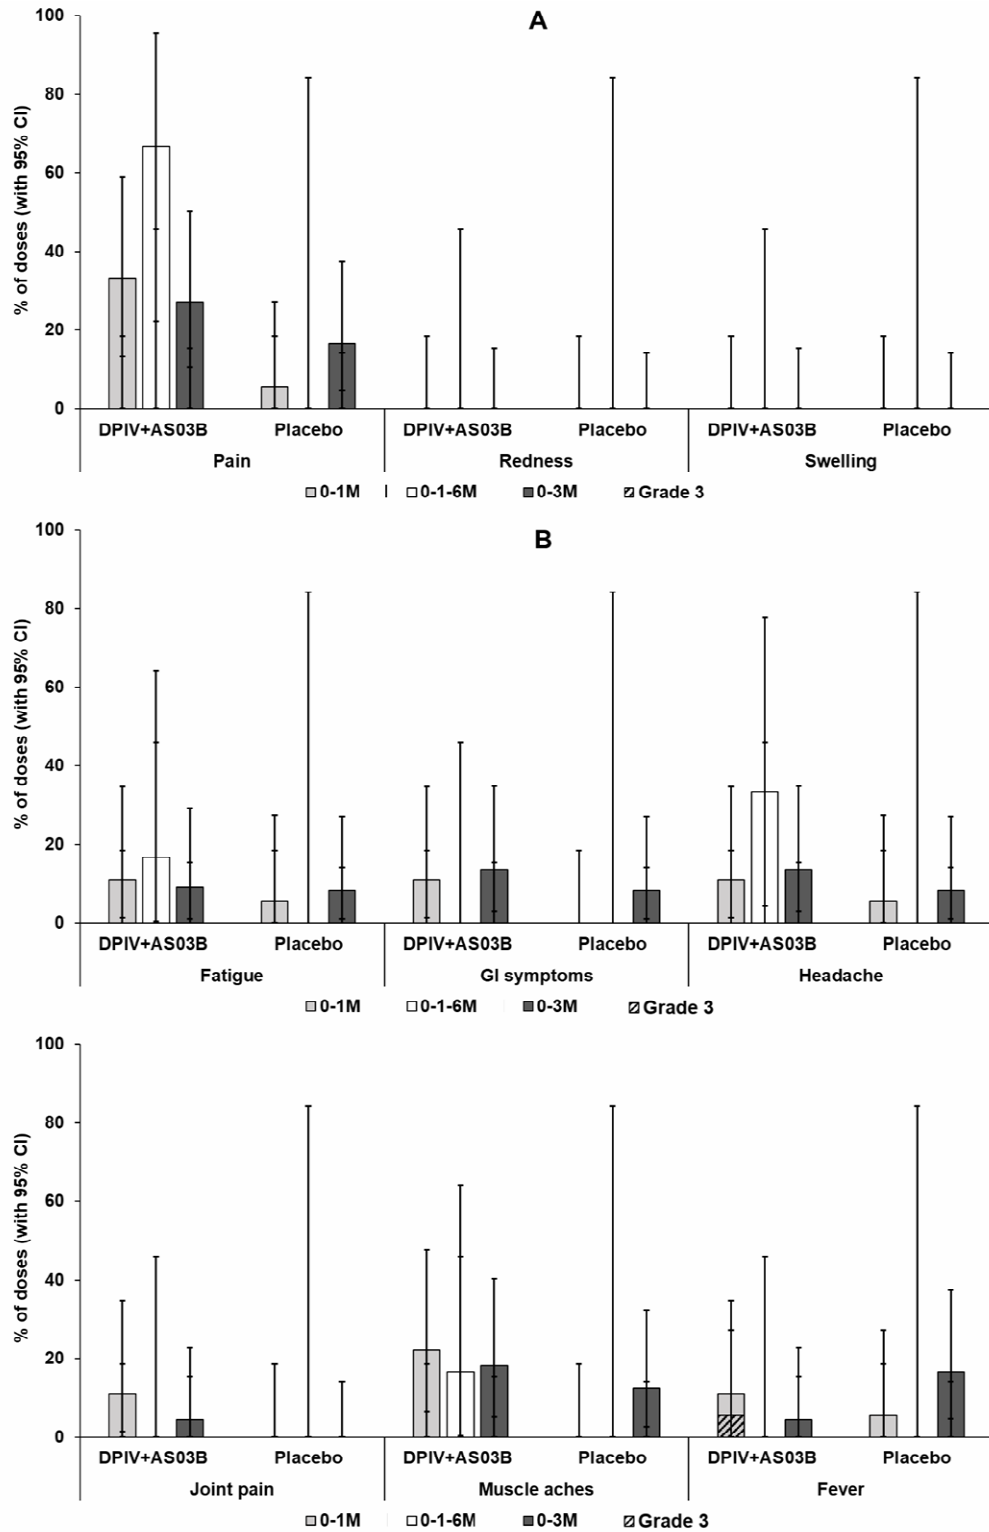

TVC, total vaccinated cohort; DPIV+AS03<sub>B</sub>, adjuvant system 03<sub>B</sub>-adjuvanted inactivated tetravalent dengue virus vaccine; M, month; 0-1 M, participants receiving 2 doses of DPIV+AS03<sub>B</sub> administered

one month apart, at M0 and M1; 0-1-6 M, participants receiving 3 doses of DPIV+AS03<sub>B</sub> with first 2 given one month apart and the third given 6 months after the first, at M0, M1 and M6; 0-3 M, participants receiving 2 doses of DPIV+AS03<sub>B</sub> administered 3 months apart, at M3 and M6; error bars indicate 95% confidence intervals (CI); GI symptoms, gastrointestinal symptoms (nausea, vomiting, diarrhea and/or abdominal pain).



Figure S2. DENV-type-specific CD4+ and CD8+ T-cell responses up to study end (ATP cohort for immunogenicity)

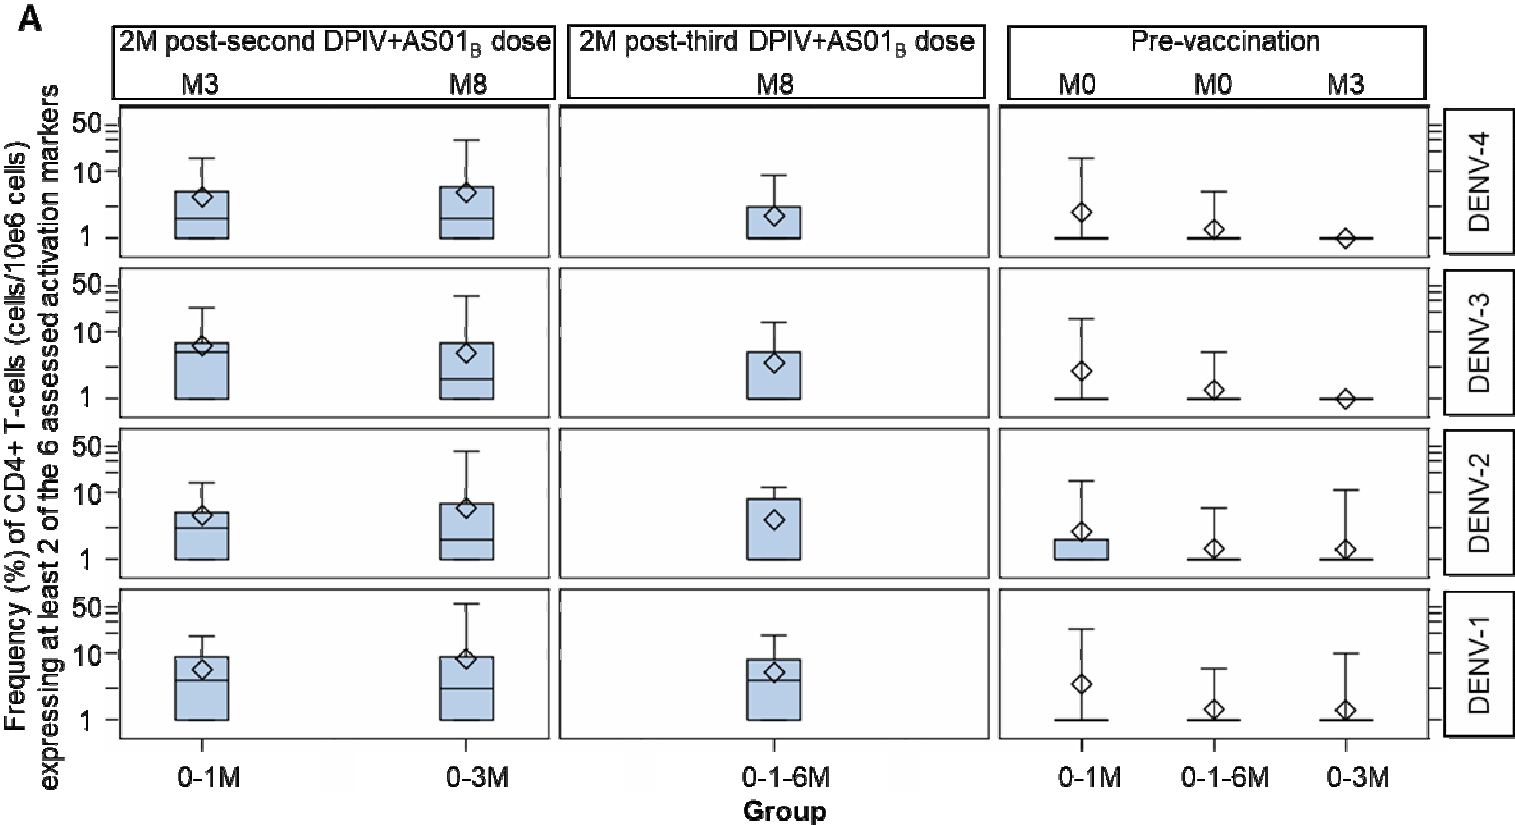

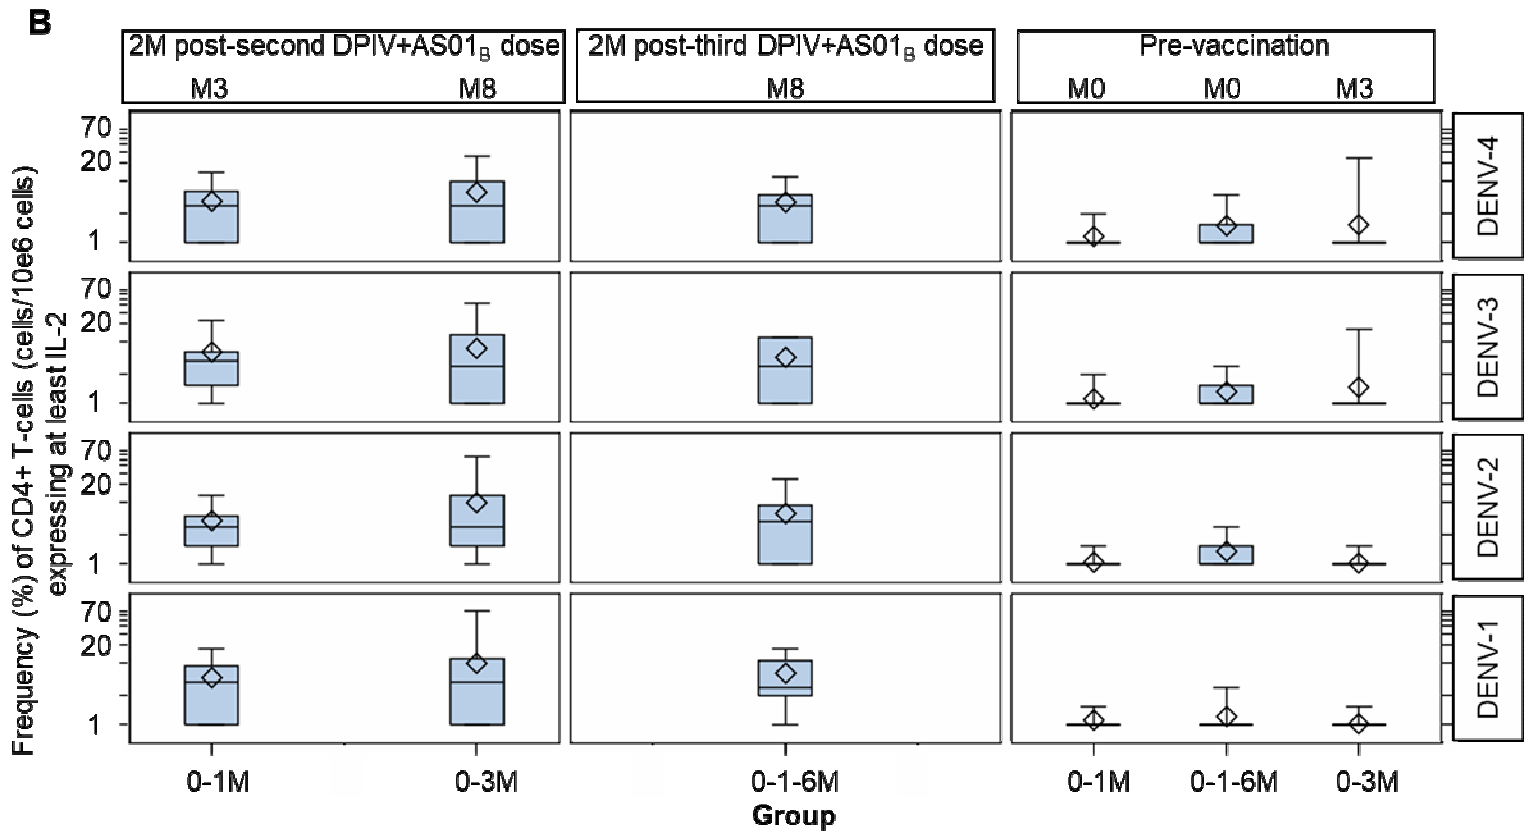

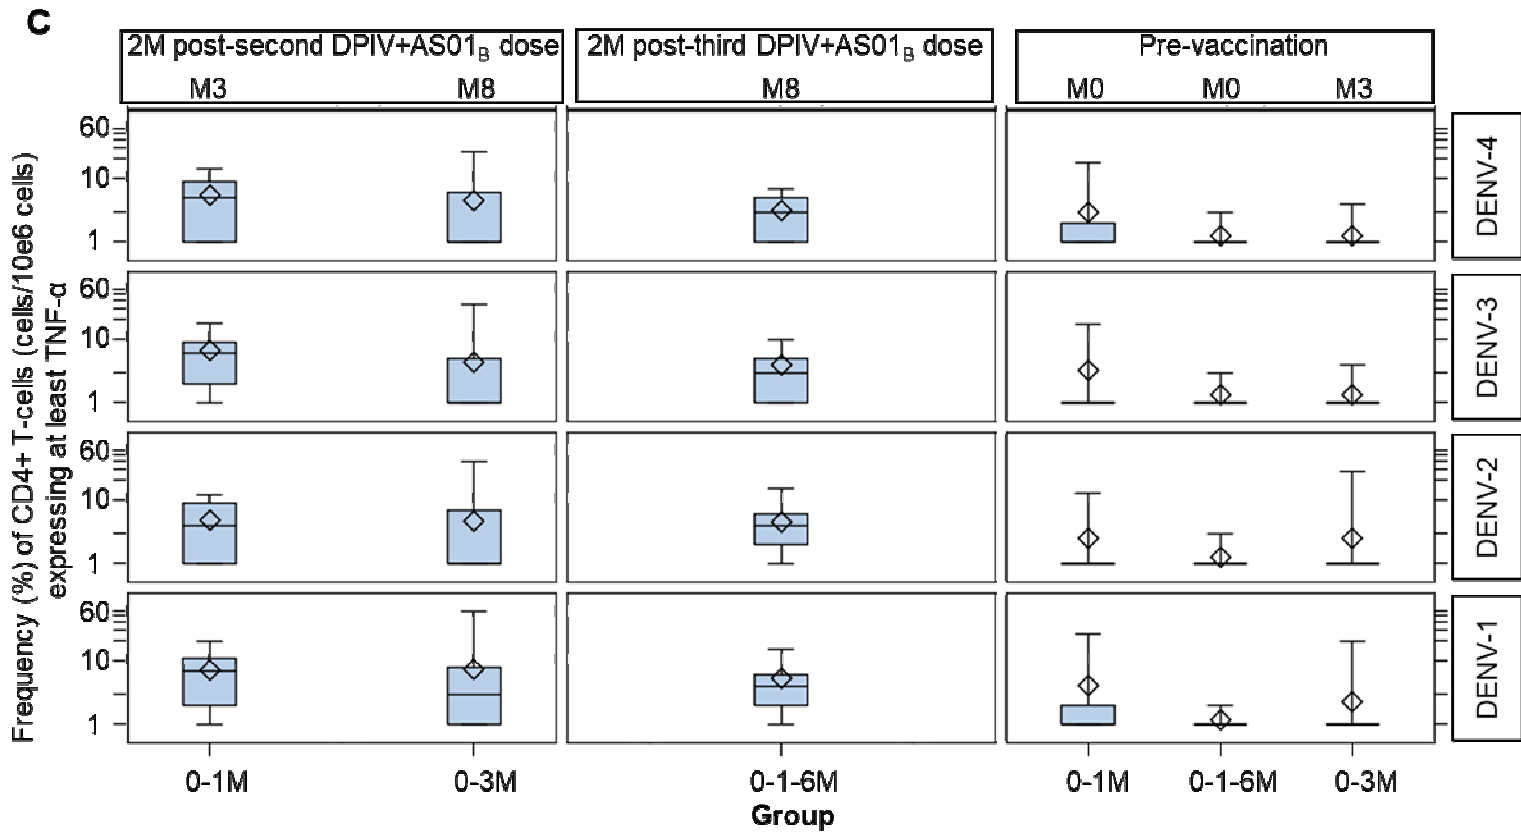

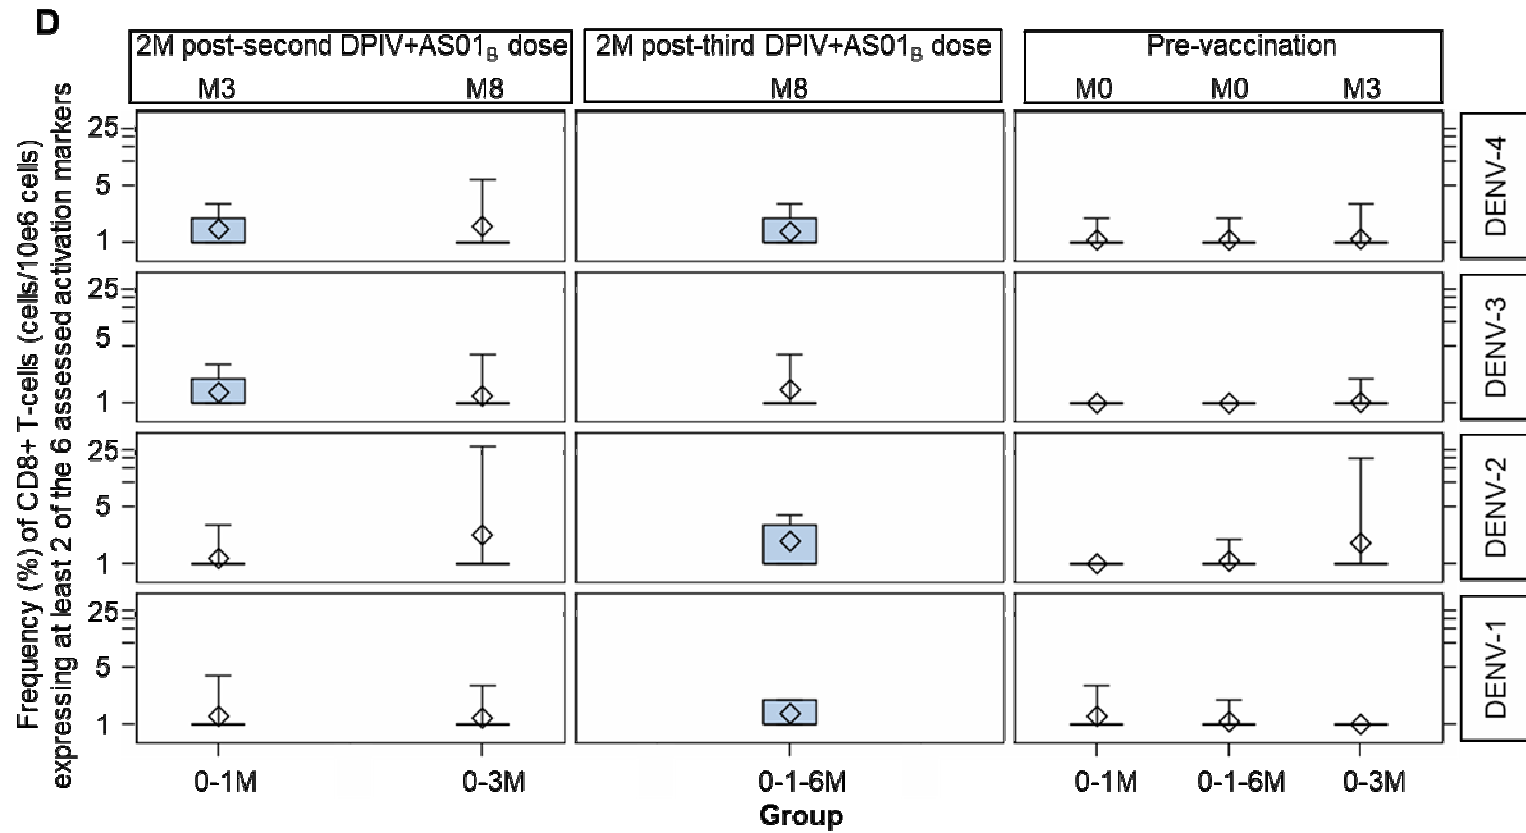

ATP, according to protocol; M, month; DPIV+AS03<sub>B</sub>, adjuvant system 03<sub>B</sub>-adjuvanted inactivated tetraivalent dengue virus vaccine; DENV, dengue virus; **0-1 M**, participants receiving 2 doses of DPIV+AS03<sub>B</sub> administered one month apart, at M0 and M1; **0-1-6 M**, participants receiving 3 doses of DPIV+AS03<sub>B</sub> with first 2 given one month apart and the third given 6 months after the first, at M0, M1 and M6; **0-3 M**, participants receiving 2 doses of DPIV+AS03<sub>B</sub> administered 3 months apart, at M3 and M6; IL-2, interleukin 2; TNF- $\alpha$ , tumor necrosis factor-alpha.
