# Supplementary material for: Safety and Immunogenicity of an AS03B-Adjuvanted Inactivated Tetravalent Dengue Virus Vaccine Administered on Varying Schedules to Healthy U.S. Adults: A Phase 1/2 Randomized Study
Source: PubMed Central journal article supplement (PMC7356407; doi:10.4269/ajtmh.19-0738), 2020-04-27

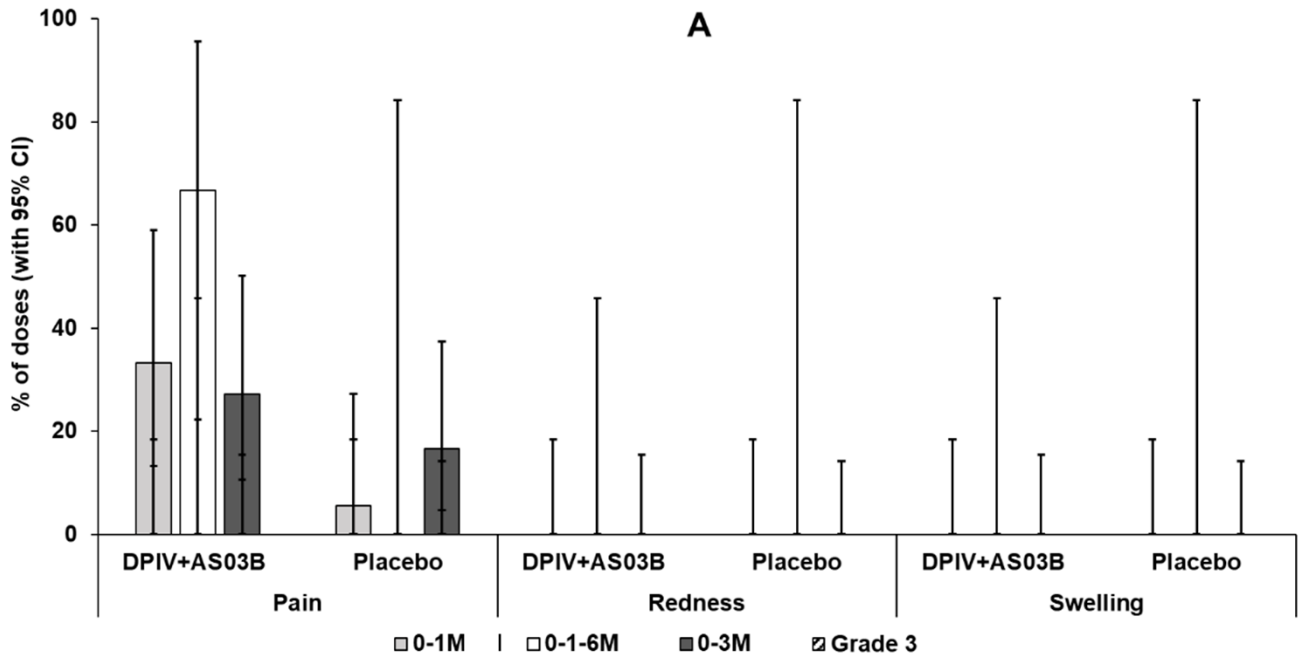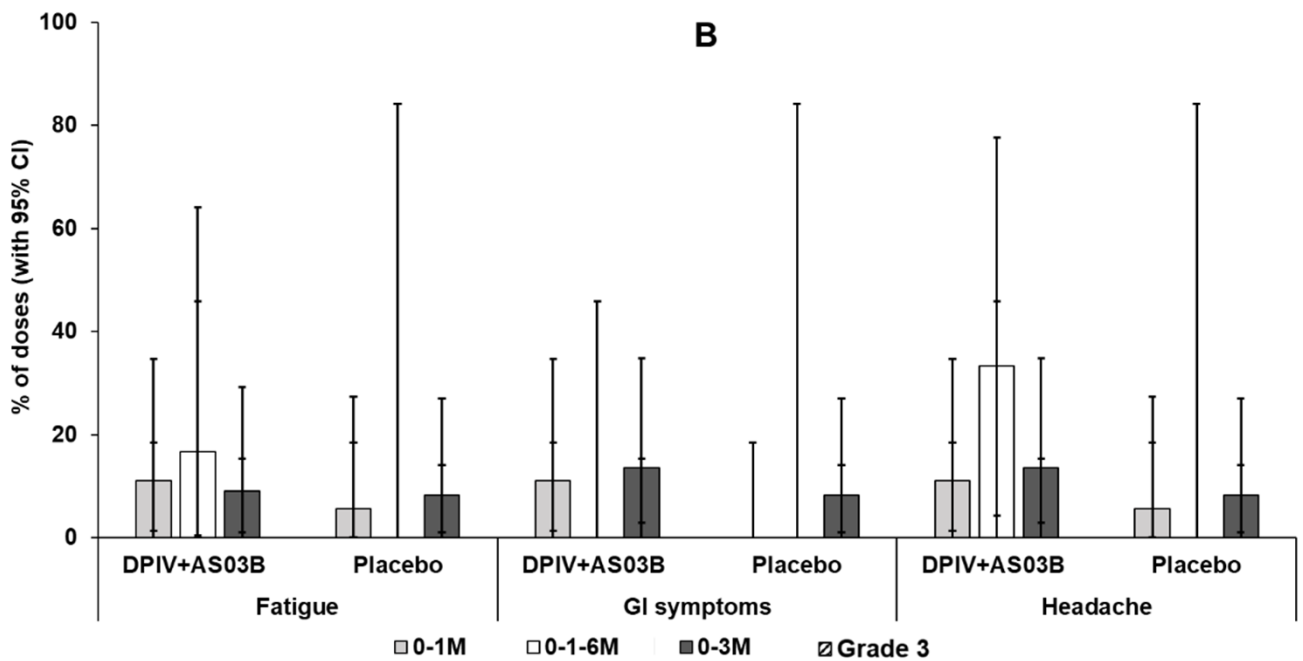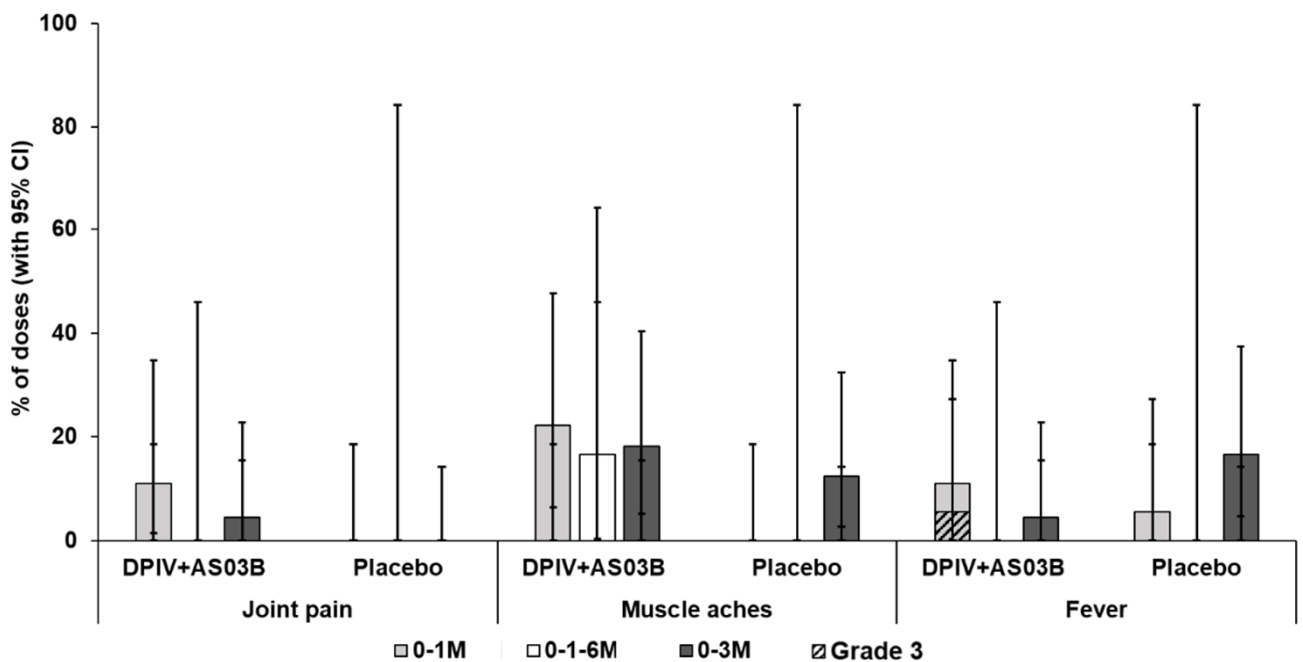

Supplement: tpmd190738.SD2.pdf [file tpmd190738.SD2.pdf]
