# Supplementary material for: Safety and Immunogenicity of an AS03B-Adjuvanted Inactivated Tetravalent Dengue Virus Vaccine Administered on Varying Schedules to Healthy U.S. Adults: A Phase 1/2 Randomized Study
Source: PubMed Central journal article supplement (PMC7356407; doi:10.4269/ajtmh.19-0738), 2020-04-27

**A**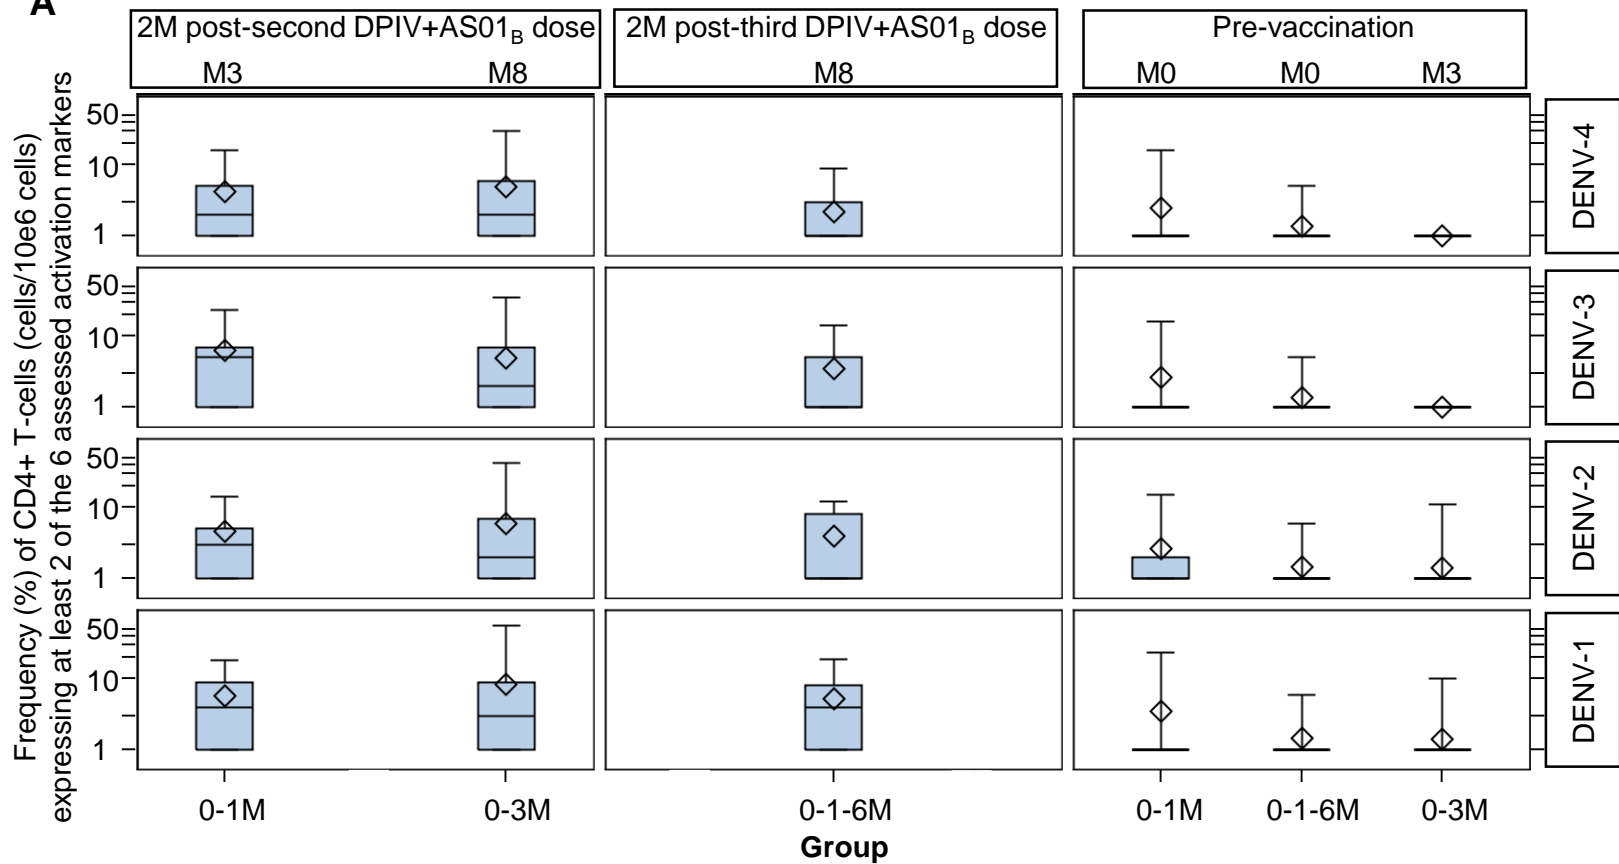

**B**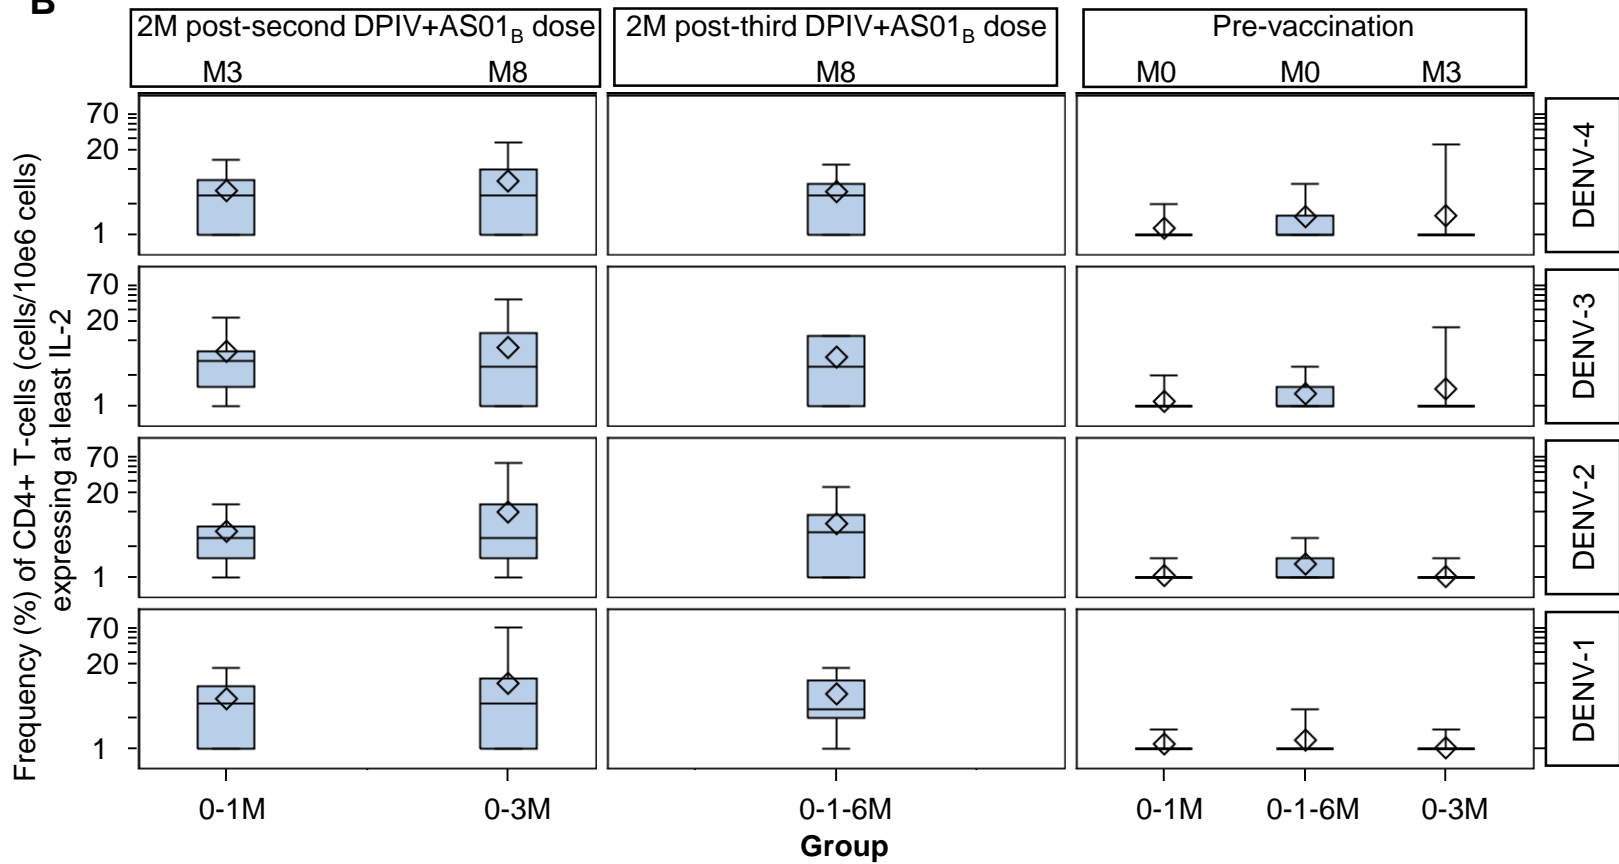

**C**Frequency (%) of CD4+ T-cells (cells/10e6 cells) expressing at least TNF- $\alpha$ 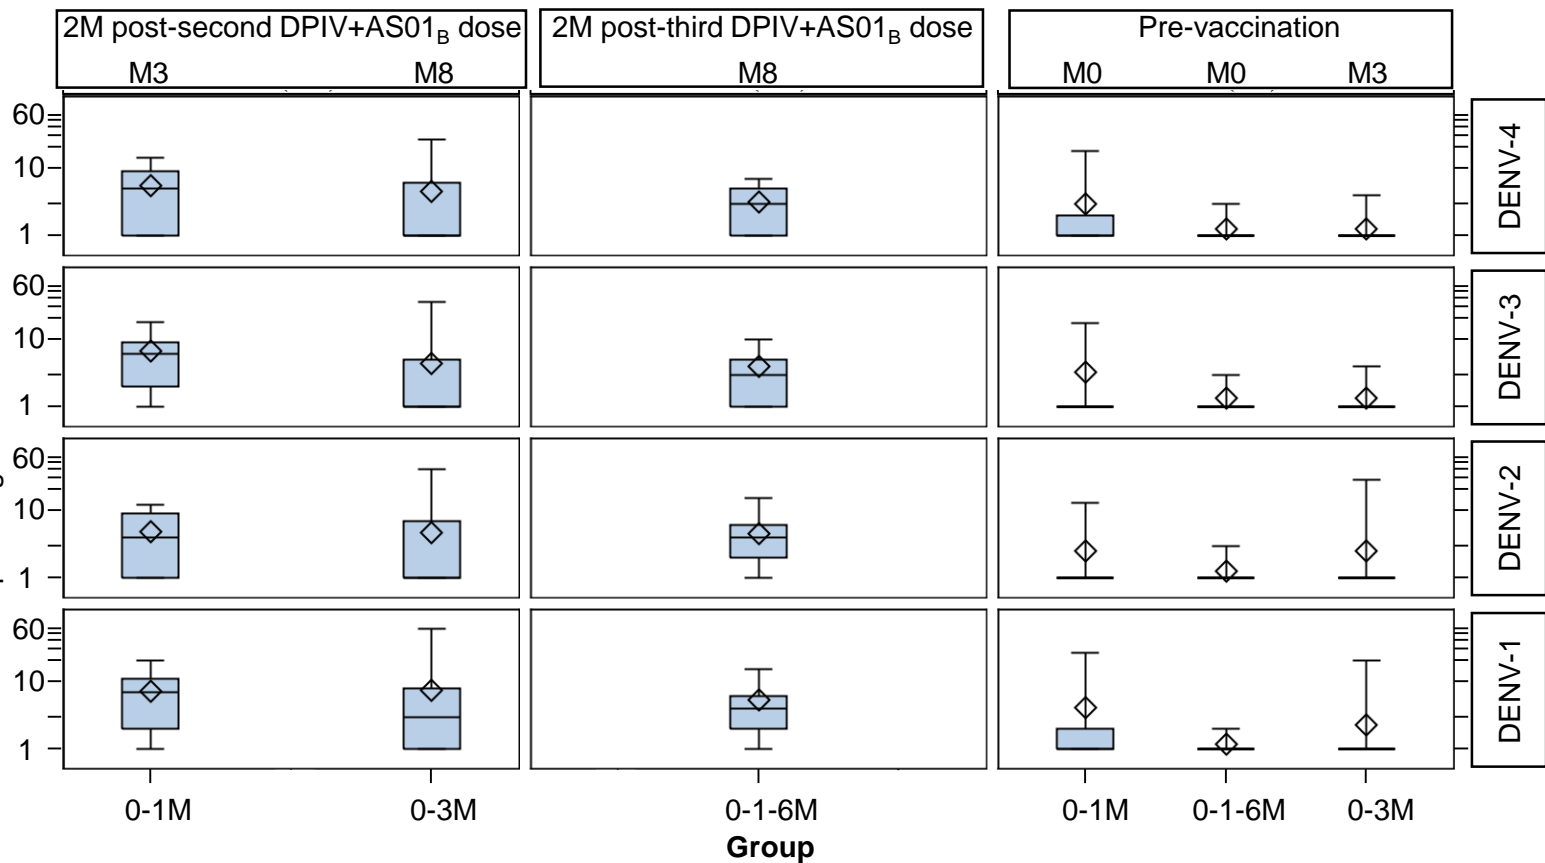

**D**

Frequency (%) of CD8+ T-cells (cells/10e6 cells) expressing at least 2 of the 6 assessed activation markers

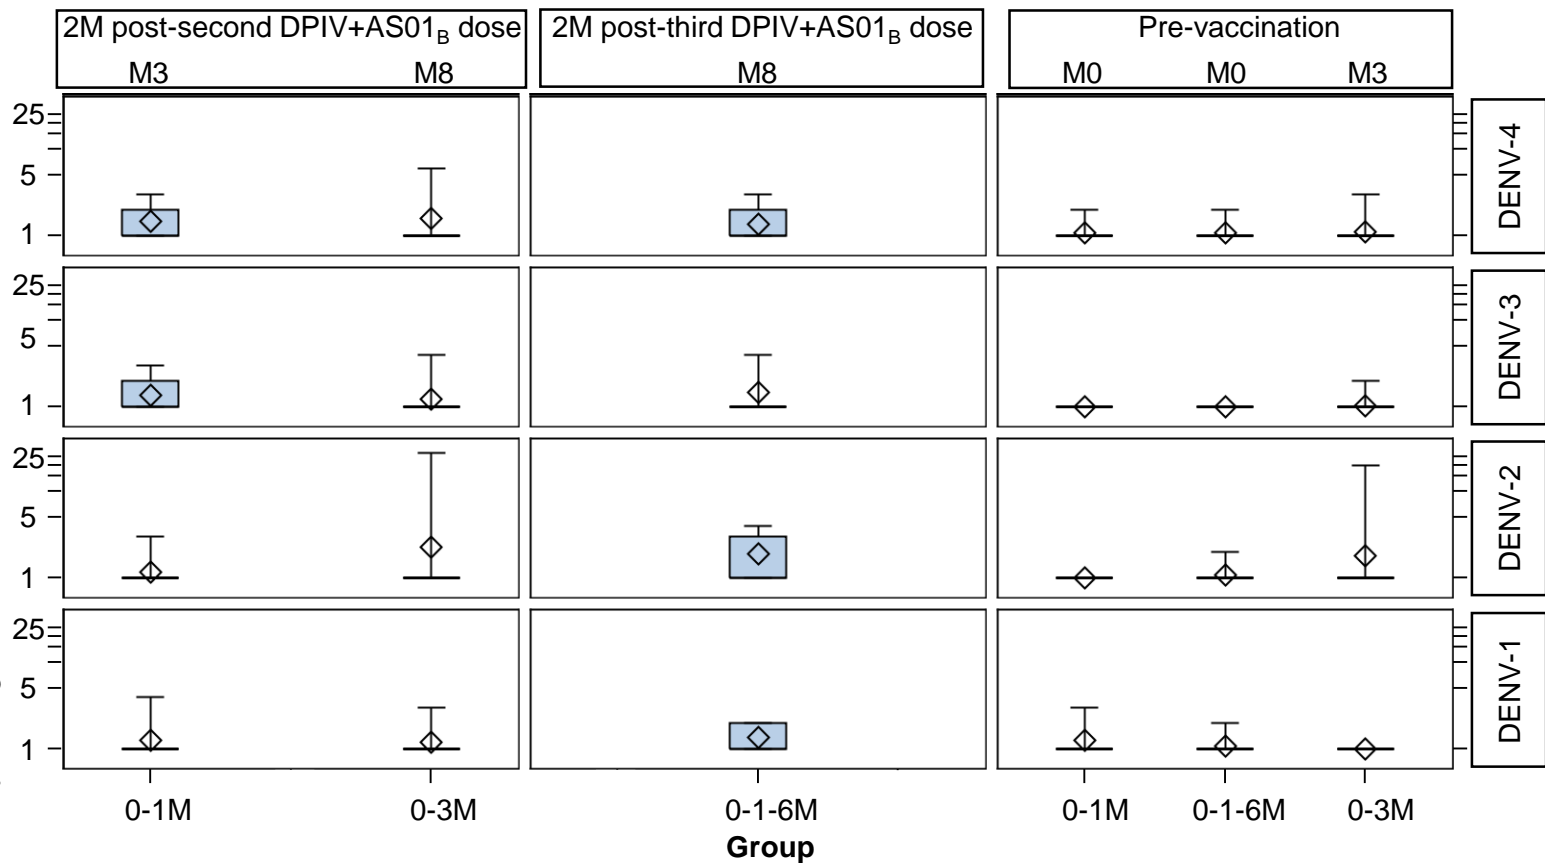

Supplement: tpmd190738.SD3.pdf [file tpmd190738.SD3.pdf]
